1           **Endosomal free fatty acid receptor 2 signaling is essential for**  
2           **propionate-induced anorectic gut hormone release**

3   Natarin Caengprasath<sup>1†</sup>, Noemi Gonzalez-Abuin<sup>2†</sup>, Maria Shchepinova<sup>3</sup>, Yue Ma<sup>2</sup>,  
4   Asuka Inoue<sup>4</sup>, Edward W. Tate<sup>3</sup>, Gary Frost<sup>2#</sup> and Aylin C. Hanyaloglu<sup>1\*#</sup>

5       1. Institute of Reproductive and Developmental Biology, Department of Metabolism,  
6       Digestion and Reproduction, Imperial College London, London, UK.

7       2. Department of Metabolism, Digestion and Reproduction, Imperial College London,  
8       London, UK

9       3. Department of Chemistry, Imperial College London, London, UK

10      4. Graduate School of Pharmaceutical Sciences, Tohoku University, Sendai, Japan

11  
12   \*Lead contact: Dr. Aylin Hanyaloglu, Institute of Reproductive and Developmental  
13   Biology (IRDB), Rm 2009, Imperial College London, Hammersmith Campus, Du  
14   Cane Road, London W12 0NN, UK. E-mail: [a.hanyaloglu@imperial.ac.uk](mailto:a.hanyaloglu@imperial.ac.uk), Tel: +44  
15   20 75942104, Fax: +44 20 75942184

16   #Senior Authors

17   †These authors contributed equally

18

19

20

## 21 **Summary**

22 The ability of propionate, a short chain fatty acid produced from the fermentation of  
23 non-digestible carbohydrates in the colon, to stimulate the release of anorectic gut  
24 hormones, such as glucagon like peptide-1 (GLP-1), is an attractive approach to  
25 enhance appetite regulation, weight management and glycaemic control. Propionate  
26 induces GLP-1 release via its G protein-coupled receptor (GPCR), free fatty acid  
27 receptor 2 (FFA2); a GPCR that activates G $\alpha$ i and G $\alpha$ q/11 pathways. However, how  
28 pleiotropic GPCR signaling mechanisms in the gut regulates appetite is poorly  
29 understood. Here, we identify propionate-mediated G protein signaling is spatially  
30 directed within the cell via the targeting of FFA2 to very early endosomes.  
31 Furthermore, propionate activates an endosomal G $\alpha$ i/p38 signaling pathway, which is  
32 essential for propionate-induced GLP-1 release in enteroendocrine cells and colonic  
33 crypts. Our study reveals that intestinal metabolites can engage membrane trafficking  
34 pathways and endosomal signaling platforms to orchestrate complex GPCR pathways  
35 within the gut.

36

37

## 38 **Introduction**

39 The consumption of dietary fiber, or non-digestible carbohydrates (NDCs), has been  
40 shown to protect against diet-induced obesity (Chambers et al., 2015). The protective  
41 effects of NDCs are largely attributed to short chain fatty acids (SCFAs) that are  
42 produced in the colon by microbiota from the fermentation of NDCs (Chambers et al.,  
43 2015; den Besten et al., 2013; James et al., 2003). Acetate, propionate and butyrate  
44 are the predominant SCFAs produced and in addition to regulation of gastro-intestinal  
45 functions, are involved in energy and glucose homeostasis and immune responses  
46 (den Besten et al., 2013). Traditionally, roles of SCFAs in these metabolic processes  
47 were thought to be limited to their ability to act as an energy source or as a regulator  
48 of cholesterol synthesis, however, with the discovery and characterization of G protein-  
49 coupled receptors (GPCRs) activated by SCFAs, free fatty acid receptor 2 (FFA2,  
50 previously known as GPR43) and free fatty acid receptor 3 (FFA3, previously known  
51 as GPR41), it is now widely appreciated that many SCFA activities can be attributed  
52 to these receptors (Fuller et al., 2015; Li et al., 2018; Pingitore et al., 2019; Tolhurst et  
53 al., 2012; Bolognini et al., 2016).

54

55 Among the three SCFAs, propionate has been of particular translational interest due  
56 to its ability to acutely suppress appetite via activation of FFA2 in enteroendocrine L  
57 cells, and release of the anorectic gut hormones peptide YY (PYY) and incretin  
58 glucagon like peptide-1 (GLP-1) (Tolhurst et al., 2012; Psichas et al., 2015),  
59 contributing to its role in rapid weight loss and improved insulin sensitivity following  
60 roux-en-Y gastric bypass (Liou et al., 2013). Direct health benefits of propionate in  
61 humans have been recently demonstrated whereby increasing the colonic levels of  
62 propionate in overweight humans not only exhibited reduced weight gain, but also

63 reduced abdominal adiposity and improved insulin sensitivity (Chambers et al., 2015).  
64 Thus propionate, and its receptor-mediated actions, represent an attractive system to  
65 develop therapeutic strategies in obesity management.

66

67 Although the role of SCFAs and their receptors in mediating the release of anorectic  
68 gut hormones has been demonstrated in rodent models and humans (Tolhurst et al.,  
69 2012; Bognini et al., 2016; Psichas et al., 2015; Chambers et al., 2015), our  
70 understanding of the molecular mechanisms by propionate, regulates the release of  
71 anorectic gut hormone from enteroendocrine L cells remains limited. FFA2 is coupled  
72 to both the Gai/o and Gq/11 families of heterotrimeric G proteins (Brown et al., 2003;  
73 Le Poul et al., 2003), although Gq/11 is implicated in mediating gut hormone release  
74 via increases in calcium (Bognini et al., 2016; Tolhurst et al., 2012). Models of GPCR  
75 signaling, however, have rapidly evolved over recent years from single receptors  
76 activating distinct G protein pathways at the plasma membrane, to high signal diversity  
77 that can be differentially activated by distinct ligands and exquisitely regulated at a  
78 spatial and temporal level. The spatio-temporal regulation of GPCRs can occur via a  
79 variety of processes, with membrane trafficking of GPCRs playing a central role.  
80 Membrane trafficking of GPCRs was classically viewed as a mechanism to control  
81 active cell surface receptor number by driving receptor internalization and post-  
82 endocytic sorting to divergent cellular fates. However, it is now understood that  
83 receptor internalization to endosomes provides additional intracellular signaling  
84 platforms including activation of heterotrimeric G protein signaling (Eichel and von  
85 Zastrow, 2018; Hanyaloglu, 2018). Endosomal signaling of GPCRs exhibits distinct  
86 functions from signaling activated at the plasma membrane, demonstrating the  
87 integrated nature of trafficking and signaling, and providing a mechanism for cells to

88 achieve highly-specific and diverse downstream responses to its dynamic extracellular  
89 environment (Thomsen et al., 2018; Caengprasath and Hanyaloglu, 2019).  
90 Furthermore, we have previously shown that GPCRs are organized to distinct  
91 endosomal compartments to activate signaling (Sposini et al., 2017; Jean-Alphonse  
92 et al., 2014). These discoveries over the past decade have rewritten the GPCR  
93 ‘signaling atlas’, offering new interpretations of faulty GPCR activity in disease and  
94 providing novel therapeutic strategies to target GPCR signaling (Thomsen et al.,  
95 2018). However, the role of membrane trafficking for FFA2, and the distinct actions of  
96 propionate that activates pleiotropic G protein signal pathways within the gut, remain  
97 unknown.

98

99 In this study, we demonstrate a key role for endosomal FFA2 signaling to drive  
100 propionate-induced GLP-1 release from enteroendocrine cells. Furthermore, we  
101 provide evidence that G protein signaling activated by FFA2 is differentially regulated  
102 by membrane trafficking, and that an unexpected endosomal Gai/p38 signaling  
103 pathway is required for propionate-induced GLP-1 release.

104

## 105 **Results**

### 106 **Propionate stimulates GLP-1 secretion yet activates Gai/o but not Gαq/11** 107 **signaling from colonic crypts and enteroendocrine cells**

108 Although propionate is known to mediate anorectic gut hormone release via FFA2, the  
109 ability of this SCFA to activate both upstream Gαq/11 and Gai/o signal pathways in  
110 enteroendocrine cells has yet to be fully demonstrated. FFA2 couples to both Gai/o to  
111 inhibit adenylate cyclase and reduce intracellular levels of cAMP, and Gαq/11 that  
112 activates phospholipase C resulting in increases in inositol 1,4,5-triphosphate (IP<sub>3</sub>)  
113 and diacylglycerol, leading to mobilization of calcium from intracellular stores.

114

115 In both mouse enteroendocrine (STC-1) cells and colonic crypts, propionate was able  
116 to inhibit forskolin-induced cAMP, which was significantly reversed by pre-treatment  
117 with Gai/o inhibitor pertussis toxin (Ptx) (Figure 1A and 1B). Surprisingly, propionate  
118 did not induce either an increase in intracellular calcium (Figure 1C and 1D) or IP<sub>1</sub>, a  
119 downstream metabolite of IP<sub>3</sub>, in either STC-1 cells or colonic crypts (Figure 1E and  
120 1F) despite its ability to induce GLP-1 release (Figure 1G and 1H). In contrast, a  
121 previously described selective FFA2 synthetic allosteric ligand (Lee et al., 2008) 4-  
122 CTMB, and a previously characterized selective FFA2 synthetic orthosteric ligand,  
123 compound 1 (Hudson et al., 2013) (Cmp1) activated both Gai/o and Gαq/11 signaling  
124 in STC-1 cells and colonic crypts (Figure S1A, 1C-1F). Thus, further demonstrating  
125 functional FFA2 in both cultures. The synthetic ligand-induced calcium responses  
126 were Gαq/11-mediated as they were significantly impaired by the pre-treatment of a  
127 selective Gαq/11 inhibitor, YM-254890 (Takasaki et al., 2004) in STC-1 cells (Figure  
128 S1B).

129

130

131 Despite the lack of detectable Gαq/11 signaling, propionate-induced-Gai/o signaling  
132 was dependent on FFA2 as the reduction of forskolin-induced cAMP in colonic crypts  
133 derived from FFA2 knockout mice (FFA2<sup>-/-</sup>) was completely abolished (Figure 1I),  
134 consistent with our prior reports from the same mouse model that propionate-induced  
135 gut hormone release from the colon requires FFA2 (Psichas et al., 2015). This loss of  
136 propionate-mediated Gai/o signaling in the FFA2<sup>-/-</sup> crypts was not due to alterations  
137 in Ffar3 expression (Figure 1J).

138

139 These data confirm that despite functional FFA2 responses, propionate activates  
140 Gai/o signaling without detectable Gαq/11 responses in these cultures. To determine  
141 if the inability of propionate to activate Gαq/11 signaling via FFA2 was cellular context-  
142 specific, we stimulated HEK 293 cells expressing FLAG-FFA2. Upon stimulation with  
143 SCFAs, propionate significantly induced increases in intracellular calcium and IP<sub>1</sub>,  
144 (Figure S1C and S1D) confirming activation of Gαq/11 signaling. Taken together, this  
145 demonstrates that unlike synthetic FFA2 ligands, propionate is not able to signal via  
146 Gαq/11 in enteroendocrine cells, suggesting additional mechanisms beyond G-protein  
147 activation are employed to induce propionate-mediated anorectic gut hormone  
148 secretion.

149

### 150 **FFA2/G protein signaling is spatially regulated**

151 We next determined if propionate/FFA2 activation is spatially regulated via membrane  
152 trafficking as a potential mechanism underlying its actions in the gut. Many GPCRs  
153 undergo ligand-induced internalization via a well described β-arrestin- and clathrin-  
154 dependent mechanism, whereby the large GTPase dynamin regulates the latter steps

155 of endocytosis that drive clathrin-coated vesicle scission. To inhibit FFA2  
156 internalization the ability of a potent inhibitor of dynamin GTPase activity, Dyngo-4a,  
157 known to block the internalization of many GPCRs (McCluskey et al., 2013; Eichel et  
158 al., 2016; Tsvetanova and von Zastrow, 2014; Sposini et al., 2017), was first assessed  
159 in HEK 293 cells expressing FLAG-tagged FFA2 and imaged via confocal microscopy.  
160 Unexpectedly, FFA2 exhibited both constitutive and propionate-dependent  
161 internalization from the plasma membrane (Figure 2A), which was confirmed via flow  
162 cytometry (Figure S2A). In cells pre-treated with Dyngo-4a, a strong inhibition of both  
163 constitutive and propionate-induced FFA2 internalization was observed (Figure 2A),  
164 demonstrating that FFA2 constitutive and ligand-induced internalization occur in a  
165 dynamin-dependent manner. Under conditions where dynamin-dependent FFA2  
166 internalization was inhibited in HEK 293 cells, the ability of propionate to inhibit  
167 forskolin-induced cAMP was impaired (Figure 2B). In contrast, FFA2-mediated G $\alpha$ q/11  
168 signaling, as measured by intracellular calcium responses (Figure 2C) or IP-1  
169 accumulation (Figure S2B), was not significantly affected, suggesting a differential  
170 requirement of FFA2 internalization for FFA2 mediated signaling. These results were  
171 also confirmed in HEK 293 cells lacking  $\beta$ -arrestins 1 and 2 (Grundmann et al., 2018)  
172 (Figure S2C). Interestingly, only ligand-induced, but not constitutive, FFA2  
173 internalization was inhibited by lack of  $\beta$ -arrestins (Figure S2D). However, as in cells  
174 pre-treated with Dyngo-4a, propionate-dependent inhibition of forskolin-induced cAMP  
175 was significantly impaired in  $\beta$ -arrestin knockout cells compared to wildtype HEK 293  
176 cells (Figure 2E). In contrast, propionate-induced calcium mobilization and IP<sub>1</sub>  
177 accumulation was unperturbed (Figure 2F and Figure S2E).

178



179 The requirement of receptor internalization for  $G_{\alpha_{i/o}}$  signaling was also determined for  
180 the endogenous propionate-responsive receptors expressed in STC-1 cells. As  
181 specific antibodies are not available for these receptors, STC-1 cells were transfected  
182 with FLAG-tagged FFA2 to confirm required conditions to inhibit FFA2 internalization  
183 in these cells. Similar, to HEK 293 cells, FFA2 internalization exhibited both  
184 constitutive and ligand-induced endocytic profiles, and both were inhibited by Dyngo-  
185 4a (Figure 2G). Consistent with our observations in HEK 293 cells, Dyngo-4a pre-  
186 treatment inhibited propionate-mediated activation of  $G_{\alpha_{i/o}}$  signaling (Figure 2H).  
187 Overall, these data demonstrate a requirement for ligand-induced FFA2 internalization  
188 in propionate-mediated  $G_{\alpha_{i/o}}$  signaling in heterologous and enteroendocrine cells.

189

#### 190 **FFA2 internalizes to very early endosomes for sorting and signaling**

191 We have previously shown that GPCRs exhibit divergent sorting to distinct endosomal  
192 compartments between early endosomes (EEs) and very early endosomes (VEEs),  
193 and this post-endocytic organization is critical for both GPCR sorting fate and  
194 endosomal signaling (Jean-Alphonse et al., 2014; Sposini et al., 2017). As  
195 internalization of FFA2 is essential for its  $G_{\alpha_{i/o}}$  signaling, we next determined the  
196 postendocytic compartment that FFA2 internalizes to. The organization of FFA2  
197 across VEEs and EEs was compared with the  $\beta$ 2-adrenergic receptor ( $\beta$ 2AR), a  
198 GPCR known to be rapidly sorted to the EE compartment (Jean-Alphonse et al., 2014).  
199 VEEs are one third the diameter of EEs, and lack classic EE markers such as early  
200 endosomal autoantigen 1 (EEA1); however, a subpopulation of VEEs contain the  
201 adaption protein APPL1 (adaptor protein phosphotyrosine interaction, pleckstrin  
202 homology domain and, leucine zipper containing 1), which plays essential roles in

203 post-VEE GPCR sorting and in regulating G protein signaling from this compartment  
204 (Jean-Alphonse et al., 2014; Sposini et al., 2017).

205

206 Internalization of FLAG-FFA2 was imaged in both live HEK 293 and STC-1 cells. FFA2  
207 internalized to ~400 nm diameter endosomes (Figure 3A), in contrast to the  
208 significantly larger size of endosomes containing internalized  $\beta$ 2AR (Jean-Alphonse  
209 et al., 2014) (Figure 3A). Furthermore, the majority (>60%) of constitutive and ligand-  
210 induced internalized FFA2 did not traffic to an EEA1 positive EE compartment,  
211 compared to ~70% for  $\beta$ 2AR that did localize to EEA1 positive endosomes (Figure  
212 3B), suggesting that FFA2 may traffic primarily to VEEs than EEs. This was further  
213 supported by the finding that a subpopulation of internalized FFA2 co-localizes with  
214 APPL1, ( $32.8 \pm 0.35\%$  following propionate treatment), similar to that observed with  
215 the luteinizing hormone receptor (LHR;  $35.2 \pm 1.92\%$ ), a GPCR known to traffic to  
216 VEEs (Sposini et al., 2017) (Figure 3C).

217

218 As FFA2 was primarily targeted to the VEE and propionate-induced FFA2 signaling  
219 requires internalization in enteroendocrine cells, we next investigated whether this  
220 compartment regulates FFA2 activity. We previously demonstrated that APPL1 is  
221 essential in rapid recycling of GPCRs targeted to this compartment back to the plasma  
222 membrane (Sposini et al., 2017). To determine a functional requirement of APPL1 on  
223 FFA2 trafficking, cellular levels of APPL1 were depleted via small interfering RNA  
224 (siRNA) in HEK 293 cells stably expressing FLAG-FFA2 (Figure 4A). We first  
225 examined the post-endocytic fate of FLAG-FFA2 when activated by propionate by  
226 confocal microscopy. APPL1 knockdown strongly impaired propionate-induced FFA2  
227 recycling, in contrast, there was no effect in cells treated with NaCl (constitutive

228 trafficking) as there was a complete return of the receptor back to the plasma  
229 membrane (Figure 4B). The role of APPL1 in rapid FFA2 recycling was quantitated via  
230 live-cell total internal reflection fluorescence microscopy (TIRFM) of an FFA2 tagged  
231 at the extracellular N-terminus with pH-sensitive GFP super-ecliptic pHluorin (SEP).  
232 SEP fluoresces in an extracellular neutral pH environment but is non-fluorescent when  
233 confined to the acidic lumen of endosomes, and therefore enables the detection of  
234 receptors upon insertion into the plasma membrane (Miesenbock et al., 1998;  
235 Yudowski et al., 2007). TIRFM imaging of SEP-tagged FFA2 (SEP-FFA2) established  
236 that FFA2 recycling events (identified as “puffs” of GFP fluorescence at the  
237 membrane) were transient and increased significantly within 5 minutes of propionate  
238 treatment, whereas treatment with NaCl exhibited a low rate of basal events (Figure  
239 S3A and B). The frequency of these events remained constant throughout the duration  
240 of the imaging period (30 minutes) (Figure S3C). These plasma membrane insertion  
241 events were not affected by pre-treatment of cells with cycloheximide, suggesting that  
242 such events are not due to *de novo* receptor biogenesis (Figure S3D). In cells depleted  
243 of APPL1, however, propionate-induced, but not constitutive, recycling of SEP-FFA2  
244 was significantly impaired (Figure 4C).

245

246 In addition to regulating the post-endocytic sorting of VEE targeted receptors, APPL1  
247 also negatively regulates GPCR/G $\alpha$ s signaling from this compartment (Sposini et al.,  
248 2017). As we have demonstrated that propionate-induced G $\alpha$ i/o signaling requires  
249 receptor internalization, we next examined the potential role of the VEE in FFA2  
250 signaling. Depletion of APPL1 resulted in a 2-fold increase in propionate-mediated  
251 inhibition of forskolin-stimulated cAMP (Figure 4D), suggesting that APPL1 can also  
252 negatively regulate heterotrimeric G $\alpha$ i/o signaling in addition to G $\alpha$ s signaling.

253 Negative regulation of Gai/o signaling by APPL1 was conserved in STC-1 cells as  
254 depletion of APPL1 levels also resulted in a significant enhancement of propionate-  
255 mediated inhibition of forskolin-induced cAMP (Figure S4 and Figure 4E).

256

257 The above data indicates that propionate-induced Gai/o signaling may occur from  
258 VEEs, and regulated by APPL1 endosomes, therefore we next determined whether  
259 FFA2 colocalizes with Gai in APPL1-positive endosomes. HEK 293 cells expressing  
260 FLAG-FFA2 and Gai-venus were imaged via TIRFM as VEEs are prevalent in the  
261 peripheral juxtamembrane region of cells (Sposini et al., 2017). TIRFM analysis  
262 revealed that FFA2 and Gai-venus positive endosomes are heterogeneous and  
263 characterized by FFA2-Gai endosomes with and without APPL1. In addition, FFA2  
264 endosomes were also positive for APPL1 where no Gai was present (Figure 4F).  
265 Overall, these data demonstrate that APPL1 is essential for propionate-induced FFA2  
266 trafficking from the VEE and regulation of propionate-mediated Gai/o signaling.

267

### 268 **Endosomal Gai/o signaling regulates propionate-induced GLP-1 release**

269 As FFA2 internalization requires propionate-induced Gai/o signaling, we next  
270 assessed whether Gai/o endosomal signaling regulates GLP-1 secretion. First, we  
271 examined the involvement of Gai/o versus Gαq/11 signaling in mediating propionate-  
272 induced GLP-1 release, using Gai/o or Gαq/11 inhibitors at concentrations that we  
273 demonstrated could inhibit receptor signaling in enteroendocrine cells (Figure 1A-B  
274 and Figure S1B). STC-1 cells or colonic crypts with pretreated with Ptx impaired  
275 propionate-induced GLP-1 release (Figure 5A-B). In contrast, pretreatment of STC-1  
276 cells with the Gαq/11 inhibitor, YM-254890, had no significant effect on propionate-  
277 mediated GLP-1 release (Figure 5C). In colonic crypts however, propionate-induced

278 GLP-1 release in the presence of YM-25480 was impaired (Figure 5D). As we did not  
279 observe propionate-induced Gαq/11 signaling in colonic crypts (Figure 1F-I), we  
280 determined if propionate-mediated FFA2 Gαi/o signaling is altered in the presence of  
281 YM-25480 in these primary cultures. In the presence of YM-25480, propionate-  
282 mediated inhibition of forskolin-induced cAMP was partially, but significantly impaired  
283 compared to control treated cells (Figure S5A). This was only specific to propionate-  
284 mediated FFA2 signaling, as YM-25480 had no effect on propionate-mediated  
285 signaling from FFA3, a receptor coupled to only Gαi/o (Figure S5B). Together these  
286 data suggest that in STC-1 cells and colonic crypts, propionate induces GLP-1  
287 secretion via a Gαi/o-dependent mechanism.

288

289 The requirement of Gαi/o signaling for propionate-mediated GLP-1 release, and the  
290 critical role of propionate-driven FFA2 internalization for G protein signaling suggests  
291 a role for propionate-induced receptor internalization. To test this hypothesis, receptor  
292 endocytosis in STC-1 cells was blocked by Dyngo-4a treatment (Figure 2G). In cells  
293 treated with Dyngo-4a, propionate exhibited a marked reduction in GLP-1 release  
294 compared to control treated cells (Figure 5E). This inhibition by Dyngo-4a was not a  
295 result of an overall decreased capacity for these cells to secrete hormone as forskolin-  
296 induced GLP-1 release was not affected by inhibition of dynamin GTPase activity  
297 (Figure S6A). In colonic crypts, pretreatment with Dyngo-4a, impaired propionate-  
298 induced GLP-1 release but not to the same degree as observed in STC-1 cells (Figure  
299 5F). As we have observed an essential dependence of propionate-driven FFA2  
300 internalization for not only G protein signaling in STC-1 cells (Figure 2H) but also for  
301 GLP-1 release, we hypothesized that the lack of modulation of propionate-induced  
302 GLP-1 release in the presence of Dyngo-4a in colonic crypts may be due to more

303 technical limitations of Dyngo-4a in primary tissue compared to a monolayer of cells.  
304 To assess this, we determined the ability of propionate to inhibit forskolin-induced  
305 cAMP in the presence of Dyngo-4a in colonic crypts. In the presence of Dyngo-4a,  
306 propionate-mediated inhibition of forskolin-induced cAMP was significantly, but only  
307 partially impaired compared to control treated cells (Figure S6B), in contrast to the full  
308 inhibition of Gai/o signaling by Dyngo-4a observed in STC-1 cells (Figure 2H). Thus,  
309 the level of propionate-dependent Gai/o signal inhibition by Dyngo-4a correlates with  
310 its ability to inhibit propionate-driven gut hormone secretion. Overall, this suggests that  
311 endosomal Gai/o signaling mediates propionate-induced GLP-1 release.

312

313 **Propionate-induced endosomal signaling regulates GLP-1 release via activation**  
314 **of p38**

315 Increases in intracellular cAMP is an established driver of gut hormone release, yet  
316 our data indicates propionate-induces gut hormone release in a Gai/o-dependent  
317 manner, a pathway that decreases cAMP levels. Therefore, we hypothesized that the  
318 mechanism mediating endosomal Gai/o-dependent GLP-1 release is potentially via  
319 distinct downstream pathways activated by Gai/o, rather than its actions on its effector  
320 enzyme adenylate cyclase. Thus, we determined which propionate-mediated signaling  
321 pathways downstream of G protein signaling are also spatially regulated. A  
322 phosphokinase array was employed in STC-1 cells to identify propionate-induced  
323 signaling pathways dependent on receptor internalization. STC-1 cells were  
324 pretreated with Dyngo-4a and stimulated with propionate for 5 or 30 minutes. The  
325 array revealed that 16 of the 43 kinases within the array were phosphorylated after 5  
326 or 30 min of propionate treatment. However, only p38 $\alpha$ , EGF-R, MSK1/2 and Hck  
327 showed reduced phosphorylation when internalization was inhibited (Figure 6A). Of

328 these kinases, p38 $\alpha$  was selected for further analysis as this kinase and MSK1/2 are  
329 part of the same signal cascade. Furthermore, p38 $\alpha$  is known to be activated at  
330 endosomes by other GPCRs (Grimsey et al., 2015). We then asked if propionate-  
331 induced p38 activation was Gai/o-mediated. To test this, propionate-induced p38  
332 activation was assessed in STC-1 pretreated with Ptx via Western blot. Pretreatment  
333 of Ptx significantly impaired propionate-induced p38 signalling (Figure 6B).

334

335 Since propionate-induced activation of p38 involves receptor internalization and Gai/o  
336 signaling, its role in propionate-induced GLP-1 release was assessed. A widely used  
337 selective p38 inhibitor SB 203580, which inhibits the catalytic activity of p38- $\alpha$  and - $\beta$   
338 isoforms without inhibiting p38 phosphorylation mediated by upstream kinases (Ge et  
339 al., 2002) was employed and significantly impaired propionate-induced activation of  
340 p38 (Figure 6C). In STC-1 cells and colonic crypts, SB 203580 pretreatment  
341 significantly impaired propionate's ability to induce GLP-1 secretion (Figure 6D-E)  
342 suggesting that propionate-induced endosomal Gai signaling regulates GLP-1 release  
343 via a p38-dependent mechanism.

344

## 345 **DISCUSSION**

346 The ability of propionate to stimulate the release of anorectic gut hormones via the  
347 GPCR FFA2 represents a key physiological function of high interest due to its  
348 demonstrated health benefits (Chambers et al., 2015; Chambers et al., 2019).  
349 However, despite our increasing knowledge of the complexity of GPCR signaling  
350 networks in other cell systems, the underlying mechanisms regulating gut hormone  
351 release by propionate/FFA2 are poorly understood. In this study we demonstrate that

352 signaling and downstream functions of FFA2, in response to propionate is specified  
353 through tight control of receptor location.

354

355 In the gut, the current view is that GPCRs coupled to either Gas-cAMP or Gαq/11-  
356 calcium pathways mediate anorectic gut hormone release (Hauge et al., 2017; Tian  
357 and Jin, 2016). From a receptor perspective, however, it is well known that many  
358 GPCRs are pleiotropically coupled, either directly or via receptor crosstalk, and where  
359 additional mechanisms, such as intracellular receptor signaling, enable diversity in cell  
360 functions from the same G protein and second messenger system. Furthermore,  
361 different GPCR ligands (endogenous and synthetic) can elicit distinct conformational  
362 states, and thus the potential to induce bias signal activity from the same receptor. In  
363 regard to FFA2 activity, which has been characterized previously as a dually coupled  
364 GPCR in studies primarily in heterologous cells (Brown et al., 2003; Le Poul et al.,  
365 2003), to date there have been no studies demonstrating its pleiotropic coupling to  
366 both Gαi/o and Gαq/11 in the gut at the level of second messenger signaling. Thus, to  
367 delineate the mechanisms of propionate-induced GLP-1 release from enteroendocrine  
368 cells, we first profiled the second messenger signaling activated by this SCFA in our  
369 intestinal models. While propionate robustly signals via Gαi/o in a FFA2-dependent  
370 manner, it was unable to induce Gαq/11 signaling both in colonic crypts and STC-1  
371 cells. This is in contrast to prior studies reporting a propionate-dependent calcium  
372 response in colonic cultures expressing Venus fluorescent protein in enteroendocrine  
373 L cells (Tolhurst et al., 2012). The reasons for this disparity are unclear, but could  
374 relate to either the mouse model harboring Venus protein, longer culture times  
375 employed to create dispersed colonic cultures to measure calcium signaling, as  
376 opposed to the intact colonic crypts used in this study, and/or reflect a Gαi/o-mediated



377 response as Gai/o-coupled GPCRs are known to modulate calcium responses,  
378 including influx of extracellular calcium (Tang et al., 2015; Alkhatib et al., 1997). To  
379 our knowledge this is also the first demonstration that previously characterized  
380 synthetic orthosteric and allosteric FFA2 selective ligands activate Gαq/11 signaling  
381 in the colon. Although propionate may also activate FFA3, a Gai/o-coupled receptor  
382 known to also be expressed in the colon, it was demonstrated in this study that colonic  
383 crypts from FFA2 KO animals are unable to activate SCFA-dependent Gai/o signaling,  
384 and that these animals do not exhibit altered Ffar3 levels. This supports prior published  
385 work from us and others demonstrating SCFA-mediated GLP-1 release requires FFA2  
386 (Tolhurst et al., 2012; Psichas et al., 2015). FFA2 is known to be a dually coupled  
387 receptor in HEK 293 or CHO cells (Le Poul et al., 2003), and indeed our data in HEK  
388 293 cells expressing FFA2 is consistent with these reports, whereby propionate also  
389 activates Gαq/11 signaling. This potential system-dependent bias exhibited by FFA2  
390 and propionate is intriguing given FFA2 can activate Gαq/11 signaling in  
391 enteroendocrine cells when stimulated with synthetic ligands. One potential  
392 mechanism for the distinct propionate/FFA2 signal profiles between enteroendocrine  
393 cells and heterologous cells is crosstalk of FFA2 with another GPCR such as FFA3.  
394 However, it has recently been demonstrated that FFA2-Gαq/11 signaling is not  
395 decreased, but enhanced, via associations with FFA3 (Ang et al., 2018).

396

397 Propionate's inability to induce Gαq/11-mediated intracellular calcium mobilization is  
398 indeed paradoxical to what is known about the signaling requirements of anorectic gut  
399 hormone secretion (Spreckley and Murphy, 2015). However, exocytosis is known to  
400 occur via either calcium-dependent and -independent pathways (Sato et al., 1998;  
401 Komatsu et al., 1995) and also involving Gai (Aridor et al., 1993). Although we

402 observed that propionate-induced GLP-1 release was impaired in the presence of Ptx  
403 in STC-1 cells and colonic crypts, this is inconsistent with previous reports that did not  
404 find propionate-induced GLP-1 release to be modulated by Ptx (Tolhurst et al., 2012;  
405 Bolognini et al., 2016), but is impaired by the Gαq/11 inhibitor, FR900359 (Bolognini  
406 et al., 2016). However, confirmation of Ptx-dependent inhibition of propionate-  
407 mediated Gαi/o signaling at the second messenger level in STC-1 cells or crypts was  
408 not reported in these prior studies. Although FR900359 has been reported to also  
409 inhibit Gβγ-mediated signaling from Gαi/o-coupled receptors (Gao and Jacobson,  
410 2016), we observed that inhibition of Gαq/11 activation partially inhibited propionate-  
411 FFA2 Gαi/o signaling, suggesting that an active Gαq/11 is integrated with FFA2 Gαi/o  
412 signaling. Such crosstalk may be analogous to the findings that arrestin-mediated  
413 signaling of GPCRs requires an active G protein state perhaps even in the absence of  
414 second messenger responses (Grundmann et al., 2018).

415  
416 Our results demonstrating propionate-mediated GLP-1 release via Gαi/o suggest that  
417 mechanisms regulating propionate-induced release of GLP-1 may be more complex  
418 and not via Gαi/o-mediated decreases in cAMP levels per se, a second messenger  
419 that induces gut hormone release (Hauge et al., 2017). One mechanism that can  
420 diversify downstream cellular functions from a common upstream pathway is via  
421 spatial control of signaling. Indeed, agonist-induced FFA2 internalization differentially  
422 regulated Gαi and Gαq/11 signaling, demonstrating at least in HEK 293 cells that  
423 FFA2/Gαi signaling was endosomal and Gαq/11 signaling occurred from the plasma  
424 membrane. Spatial discrimination in GPCR/G protein signaling has been observed  
425 with the pleiotropically-coupled calcium-sensing receptor (Gorvin et al., 2018). The  
426 specific requirement for receptor internalization in driving FFA2-mediated Gαi/o

427 signaling was conserved in enteroendocrine cells, whereby propionate-mediated  
428 Gai/o signaling, and GLP-1 release required internalization, providing a novel  
429 mechanism underlying propionate's downstream functions in the gut. We also  
430 identified that FFA2 primarily traffics to the VEE, an endosomal compartment we have  
431 previously shown is critical for sorting and endosomal signaling for a subset of GPCRs  
432 (Jean-Alphonse et al., 2014; Sposini et al., 2017). For GPCRs that are targeted to the  
433 VEE, APPL1 has been demonstrated to be crucial for both receptor recycling and  
434 negative regulation of Gas signaling. We demonstrate that rapid ligand-induced  
435 recycling of FFA2 is also APPL1-dependent and negatively regulates FFA2-  
436 endosomal Gai/o signaling in HEK 293 and enteroendocrine cells, indicating that the  
437 APPL1/VEE compartment can negatively regulate distinct G protein pathways, in  
438 addition to Gas-coupled GPCRs (Sposini et al., 2017).

439

440 Given the requirement for active endosomal Gai/o in mediating propionate-induced  
441 gut hormone release, we hypothesized that additional endosomal Gai/o-activated  
442 pathways were important in gut hormone secretion. We identified that phosphorylation  
443 of a small subset of downstream kinases required FFA2 internalization when activated  
444 by propionate, which supports a role for endomembrane signaling in providing a signal  
445 platform to activate unique signaling substrates from the plasma membrane, or indeed  
446 other intracellular compartments (Eichel and von Zastrow, 2018; Hanyaloglu, 2018).  
447 We focused on p38 as kinases of the same pathway, MSK1/2, were also identified in  
448 the array, and p38 is known to be activated endosomally by other GPCRs (Grimsey et  
449 al., 2015). Propionate has also previously been shown to activate p38 in many cellular  
450 systems and have a role in regulating inflammatory responses (Rutting et al., 2019;  
451 Yonezawa et al., 2007; Ang et al., 2018). For enteroendocrine cells and colonic crypts,

452 we identify a key role of p38 in regulating propionate-induced GLP-1 release.  
453 Interestingly, p38 is also involved in regulating GLP-1 secretion induced by meat  
454 hydrolysate and essential amino acid- and low molecular weight chitosan (Reimer,  
455 2006; Liu et al., 2013). More recently, propionate-induced GLP-1 release was also  
456 found to be regulated by p38 in chicken intestinal epithelial cells, (Zhang et al., 2019),  
457 suggesting a conserved role of this kinase in anorectic gut hormone secretion induced  
458 by distinct metabolites.

459

460 Together, these findings strongly support a model whereby the unique health benefits  
461 of propionate to regulate appetite requires tightly controlled integration of membrane  
462 trafficking and endosomal signaling. Such a model offers a future platform to evaluate  
463 specific populations, pathophysiological alterations and the long-term health potential  
464 of elevated colonic propionate. Furthermore, it may represent a broader mechanism  
465 employed by intestinal metabolites, which activate multiple GPCRs within the gut, to  
466 diversify its functions *in vivo*.

467

468 **AUTHOR CONTRIBUTIONS:** N.C performed all signaling and trafficking experiments  
469 and GLP-1 studies in STC-1 cells. N. G-A and Y.M prepared colonic crypt cultures. N.  
470 G-A carried out GLP-1 experiments in colonic crypts and Y.M genotyped and  
471 assessed Ffar3 levels in crypts. M.S. synthesized and characterized Cmp1 under  
472 supervision of E.W.T. A.I contributed the  $\beta$ -arrestin1/2 KO cell line. N.C, N. G-A,  
473 E.W.T., G.F and A.C.H designed research, and with N.C, N. G-A, A.I, Y.M E.W.T and  
474 M.S analyzed data and wrote the paper. All authors critically read and approved the  
475 final manuscript.

476

477 **ACKNOWLEDGEMENTS**

478 We would like to thank Drs. Andreas Bruckbauer and Stephen Rothery at the Facility  
479 for Imaging of Light Microscopy at Imperial College London for technical support with  
480 TIRFM and Dr. Paul Bech and Prof. Kevin Murphy (Imperial College London) for  
481 assistance with RIAs. FLAG-FFA3 plasmid was provided by Ms. Tilly Shackley  
482 (Imperial College London). This work was supported by grants from the Biotechnology  
483 and Biological Sciences Research Council to G.F, A.C.H and E.T.W (BB/N016947/1)  
484 and to A.H and E.T.W (BB/S001565/1). A.I. was funded by the PRIME  
485 (JP18gm5910013) and the LEAP (JP18gm0010004) from the Japan Agency for  
486 Medical Research and Development (AMED); JSPS KAKENHI grant (17K08264) from  
487 the Japan Society for the Promotion of Science

## 488 **MATERIALS AND METHODS**

### 489 **Animals**

490 C57BL/6J mice purchased from Charles River were used to prepare mouse colonic  
491 crypts. FFA2 global knockout (FFA2<sup>-/-</sup>) mice were generated by Deltagen. FFA2  
492 knockout was achieved by homologous recombination that replaces 55bp of FFA2  
493 exon 1 with a cassette containing the neomycin resistance and  $\beta$ -galactosidase genes,  
494 resulting in a frameshift mutation (Maslowski et al., 2009). Animals were cared for in  
495 accordance with British Home Office under UK Animal (Scientific Procedures) Act  
496 1986 (Project License 00/6474).

### 497 **Mouse colonic crypt culture preparation**

498 Colons of male wildtype (WT) or FFA2<sup>-/-</sup> C57BL6 mice (8-12 weeks of age) were  
499 removed, cleaned and placed into ice-cold L-15 (Leibowitz) medium. The intestinal  
500 tissue was thoroughly cleaned with L-15 medium and digested with 0.4 mg ml<sup>-1</sup>  
501 collagenase in high-glucose DMEM at 37°C, as described previously (Psichas et al.,  
502 2015). ). The digestion process was repeated 4 times and resulting cell suspensions  
503 were centrifuged (5 min, 300 g). The pellets were resuspended in DMEM  
504 (supplemented with 10% fetal calf serum and 1% antibiotics, 100 U ml<sup>-1</sup> penicillin and  
505 0.1 mg ml<sup>-1</sup> streptomycin). Combined cell suspensions were filtered through a nylon  
506 mesh (pore size ~250  $\mu$ m) and plated onto appropriate culture plates, 2% Matrigel-  
507 coated plates. The plates were incubated overnight at 37°C in an atmosphere of 95%  
508 O<sub>2</sub> and 5% CO<sub>2</sub>.

509

### 510 **Colonic crypt FFA3 mRNA expression levels**

511 Total RNA was extracted from WT and FFA2<sup>-/-</sup> (age-matched) plated colonic crypts  
512 using PureLink® RNA Mink Kit (Invitrogen) and DNase treated using on-column

513 PureLink® DNase Treatment (Invitrogen). DNase-treated total RNA was reversed  
514 transcribed to a single-stranded cDNA using the high-capacity cDNA Reverse  
515 Transcription kit (Applied Biosystems). Quantitative reverse transcriptase PCR  
516 (qPCR) was carried out by QuantStudio® 12 K Flex Real-Time PCR System (Life  
517 Technologies) using TaqMan Gene Expression Assay (Applied Biosystems) with  
518 FFAR3 hydrolysis probe (Mm02621638\_1, Applied Biosystems) and 18S as the  
519 reference gene (Eukaryotic 18S rRNA Endogenous Control, Applied Biosystems). The  
520 qPCR data are presented as relative expression levels calculated by  $\Delta\Delta C_t$  (where  $\Delta C_t$   
521 is determined by the difference cycles threshold of the target gene and the reference  
522 gene).

523

#### 524 **Synthesis of Compound 1**

525 All solvents and reagents were purchased from Sigma-Aldrich, Alfa Aesar unless  
526 otherwise stated, and used without further purification. Moisture sensitive reactions  
527 were performed in oven dried flasks, under a nitrogen atmosphere. Anhydrous  
528 solvents were dispensed using Pure Solv™ solvent drying towers (Innovative  
529 Technology Inc.) Analytical thin layer chromatography was carried out using Merck  
530 Si<sub>60</sub>, F<sub>254</sub> chromatography sheets. Spots were visualised by UV light or through use of  
531 an appropriate stain (ninhydrin or potassium permanganate). Flash column  
532 chromatography was run on a Biotage Isolera™ One flash purification system using a  
533 wet-loading Biotage SNAP cartridge. Mass spectra were acquired by the Imperial  
534 Mass Spectrometry service with *m/z* values reported in Daltons. <sup>1</sup>H spectra were  
535 recorded on a Bruker Av-400 (400 Hz) instrument at RT. Chemical shifts are  
536 expressed in parts per million  $\delta$  relative to residual solvent as an internal reference.  
537 The multiplicity if each signal is indicated by: s = singlet; broad s= broad singlet; d =

538 doublet; t = triplet; m= multiplet. Coupling constants ( $J$ ), calculated using  
539 MestReNova<sup>®</sup> NMR software, are quoted in Hz and recorded to the nearest 0.1 Hz.

#### 540 **1 *N*-cyclopropyl-*N'*-benzoylthiourea**

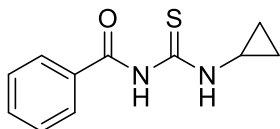

541  
542 Benzoyl isothiocyanate (820  $\mu$ L, 6.13 mmol, 1.0 eq.) was dissolved in CH<sub>2</sub>Cl<sub>2</sub> (25 mL)  
543 at 0 °C, followed by a dropwise addition of cyclopropylamine (425  $\mu$ L, 6.13 mmol, 1.0  
544 eq.). The solution was then warmed up to RT and allowed to stir for 17h. The crude  
545 mixture was concentrated *in vacuo*, yielding benzoylthiourea as a yellow solid (1348  
546 mg, quant.), which was used in the next step without further purification. <sup>1</sup>H NMR (400  
547 MHz, CDCl<sub>3</sub>):  $\delta$  10.93 (1H, broad t), 9.17 (1H, s), 7.83 (2H, dd,  $J$  = 8.4, 1.4 Hz), 7.59  
548 (1H, t,  $J$  = 7.4 Hz), 7.48 (2H, t,  $J$  = 7.9 Hz), 3.23-3.17 (1H, m), 0.93-0.89 (2H, m), 0.80-  
549 0.77 (2H, m). The compound has been characterized in the literature, data in  
550 agreement (Olken and Marletta, 1992).

#### 551 **2 Cyclopropylthiourea**

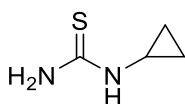

552  
553 Benzoylthiourea **1** (900 mg, 4.09 mmol, 1 eq.) was dissolved in a solution of 5% (w/v)  
554 NaOH (20 mL) and heated to 80 °C. The solution was stirred for 3h and then cooled  
555 to RT in an ice/water bath. The reaction mixture was titrated to pH 8.0 with HCl<sub>conc</sub>.  
556 The crude was extracted with EtOAc (4 x 15 mL). The organic fractions were  
557 combined, dried over anhydrous MgSO<sub>4</sub>, filtered and concentrated *in vacuo*. The  
558 crude was redissolved in CH<sub>2</sub>Cl<sub>2</sub> (10 mL) and precipitated with a dropwise addition of  
559 Et<sub>2</sub>O to afford a thiourea **2** as a white-off solid (200 mg, 42%), which was used in the  
560 next step without further purification. <sup>1</sup>H NMR (400 MHz, DMSO-d<sub>6</sub>):  $\delta$  2.35 (1H, broad



561 s), 0.67-0.63 (2H, m), 0.49-0.44 (2H, m). The compound has been characterized in  
562 the literature, data in agreement (Olken and Marletta, 1992).

### 563 **3 2-Bromo-1-(2,5-dichlorophenyl)ethanone**

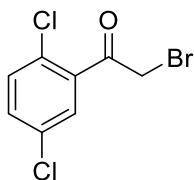

564  
565 Dichloroacetophenone (230  $\mu$ L, 1.59 mmol, 1.0 eq.) was dissolved in anhydrous  
566 MeCN (8 mL) and cooled to 0  $^{\circ}$ C under nitrogen, then NBS (312 mg, 1.75 mmol, 1.1.  
567 eq.) was added, followed by a dropwise addition of TMS $\cdot$ OTf (14  $\mu$ L, 0.08 mmol, 0.05  
568 eq.). The solution was warmed up to RT and allowed to stir for 17h under nitrogen.  
569 The reaction mixture was concentrated *in vacuo* and purified by column  
570 chromatography (1 to 5% EtOAc in Hexane over 10 CV), which afforded bromide as  
571 a white-off thick oil (235 mg, 55%, 80% pure by NMR).  $^1$ H NMR (400 MHz, CDCl $_3$ ):  $\delta$   
572 7.54 (1H, d,  $J$  = 2.4 Hz), 7.40 (1H, d,  $J$  = 2.3 Hz), 7.39 (1H, s), 4.49 (2H, s). The  
573 compound has been characterized in the literature, data in agreement (Roman et al.,  
574 2010)

### 575 **4 N-cyclopropyl-4-(2,5-dichlorophenyl)thiazol-2-amine**

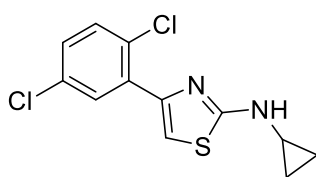

576  
577 Cyclopropylthiourea **2** (50 mg, 0.43 mmol, 1.0 eq.) was dissolved in ethanol (2 mL),  
578 followed by addition of bromide **3** (80% pure, 138 mg, 0.52 mmol, 1.2 eq.) pre-  
579 dissolved in ethanol (1 mL). The solution was allowed to stir for 3h at RT and then  
580 concentrated *in vacuo*. The residue was dissolved in CH $_2$ Cl $_2$  (5 mL), washed with  
581 saturated NaHCO $_3$  (4 mL), brine (4 mL). Organic layer was dried over MgSO $_4$ , filtered

582 and concentrated *in vacuo* to give a thick yellow oil. Column chromatography (1 to  
583 10% EtOAc in Hexane over 10 CV) afforded amine **4** as an off-white thick oil (92 mg,  
584 75%).  $R_f$  0.57 (Hex:EtOAc = 3:1).  $^1\text{H NMR}$  (400 MHz,  $\text{CDCl}_3$ ):  $\delta$  7.86 (1H, d,  $J$  = 2.6  
585 Hz), 7.37 (1H, d,  $J$  = 8.4 Hz), 7.19 (1H, dd,  $J$  = 8.3, 2.8 Hz), 7.13 (1H, broad s), 7.08  
586 (1H, s), 2.60-2.54 (1H, m), 0.69-0.64 (2H, m), 0.56-0.52 (2H, m). The compound has  
587 been characterized in the literature, data in agreement (Hoveyda et al., 2018).

588

589 **5** *tert*-Butyl (R)-3-benzyl-4-(cyclopropyl(4-(2,5-dichlorophenyl)thiazol-2-  
590 yl)amino)-4-oxobutanoate

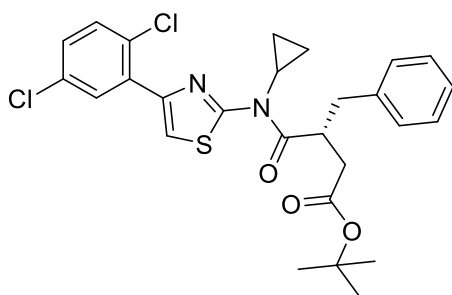

591

592 In a dry microwave vial (R)-2-benzyl-4-(tert-butoxy)-4-oxobutanoic acid (30 mg, 0.114  
593 mmol, 1.3. eq.) was dissolved in anhydrous  $\text{CH}_2\text{Cl}_2$  (1 mL) under nitrogen. Fluoro-  
594  $N,N,N',N'$ -bis(tetramethylene)formamidinium hexafluorophosphate (BTFFH) (41 mg,  
595 0.131 mmol, 1.5 eq.) was then added, followed by anhydrous  $i\text{-Pr}_2\text{NEt}$  (68  $\mu\text{L}$ , 0.391  
596 mmol, 4.5. eq.). The solution was allowed to stir for 30 min at RT under nitrogen,  
597 followed by addition of amine **4** (25 mg, 0.088 mmol, 1.0 eq.). The vial was then sealed,  
598 heated to 80  $^\circ\text{C}$  in an oil bath and allowed to stir for 18h. The yellow reaction mixture  
599 was cooled down to RT, further diluted with  $\text{CH}_2\text{Cl}_2$  (5 mL), quenched with saturated  
600  $\text{NH}_4\text{Cl}$  (4 mL), washed with  $\text{H}_2\text{O}$  (4 mL) and brine (4 mL). The organic layer was dried  
601 over anhydrous  $\text{MgSO}_4$ , filtered and concentrated *in vacuo* to give a dark-yellow thick  
602 oil. Column chromatography (1 to 10% EtOAc in Hexane over 10 CV) afforded amide  
603 **5** as a light-yellow thick oil (37 mg, 78%).  $R_f$  0.65 (Hex:EtOAc = 3:1).  $^1\text{H NMR}$  (400

604 MHz, CDCl<sub>3</sub>): δ 7.99 (1H, d, *J* = 2.8 Hz), 7.62 (1H, s), 7.39 (1H, d, *J* = 8.6 Hz), 7.30-  
605 7.15 (6H, m), 4.23-4.13 (1H, m), 3.08 (1H, dd, *J* = 13.4, 6.7 Hz), 2.96-2.82 (2H, m),  
606 2.73 (1H, dd, *J* = 13.4, 8.2 Hz), 2.44 (1H, dd, *J* = 16.4, 4.9 Hz), 1.39 (9H, s), 1.30-1.20  
607 (3H, m), 0.85-0.78 (1H, m). LRMS (ES<sup>+</sup>): 531 ([<sup>35</sup>Cl<sup>35</sup>CIM+H]<sup>+</sup>, 100%), 533  
608 ([<sup>35</sup>Cl<sup>37</sup>CIM+H]<sup>+</sup>, 75%), 535 ([<sup>37</sup>Cl<sup>37</sup>CIM+H]<sup>+</sup>, 20%). The compound has been  
609 characterized in the literature, data in agreement (Hoveyda et al., 2018).

610

611 **6** (R)-3-benzyl-4-(cyclopropyl(4-(2,5-dichlorophenyl)thiazol-2-yl)amino)-4-  
612 oxobutanoic acid (**Cmp1**)

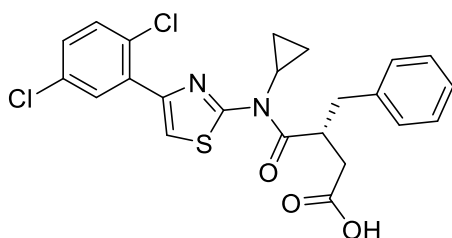

613

614 Amide **5** (10 mg, 0.019 mmol, 1.0 eq.) was dissolved in anhydrous CH<sub>2</sub>Cl<sub>2</sub> (180 mL)  
615 under nitrogen, followed by addition of TFA<sub>conc</sub> (40 mL, 20% (v/v)). The solution was  
616 allowed to stir for 4h at RT. The reaction mixture was concentrated *in vacuo*,  
617 redissolved in CH<sub>2</sub>Cl<sub>2</sub> (3 mL) and quenched with saturated NaHCO<sub>3</sub> (3 mL). The  
618 organic layer was dried over anhydrous MgSO<sub>4</sub>, filtered and concentrated *in vacuo*.  
619 The residue was redissolved in CH<sub>2</sub>Cl<sub>2</sub> (3 mL) and precipitated with a dropwise  
620 addition of Et<sub>2</sub>O to afford **Cmp1** as a beige powder (4.6 mg, 51%). The compound is  
621 unstable in solution under non-anhydrous conditions and decomposes to starting  
622 materials. The 10 mM stock of **Cmp1** in DMSO was immediately aliquoted and kept  
623 frozen at -20 °C. <sup>1</sup>H NMR (400 MHz, DMSO-d<sub>6</sub>): δ 7.96 (1H, d, *J* = 2.7 Hz), 7.82 (1H,  
624 broad s), 7.61 (1H, d, *J* = 8.7 Hz), 7.47 (1H, dd, *J* = 8.4, 2.6 Hz), 7.32-7.14 (5H, m),  
625 4.16-4.02 (1H, m), 3.07-2.81 (2H, m), 2.80-2.61 (2H, m), 2.38 (1H, d, *J* = 2.40 Hz),  
626 1.28-1.16 (3H, m), 0.85-0.74 (1H, m). ). LRMS (ES<sup>+</sup>): 475 ([<sup>35</sup>Cl<sup>35</sup>CIM+H]<sup>+</sup>, 100%), 477

627 ( $[^{35}\text{Cl}^{37}\text{Cl}+\text{H}]^+$ , 75%), 479 ( $[^{37}\text{Cl}^{37}\text{Cl}+\text{H}]^+$ , 20%). The compound has been  
628 characterized in the literature, data in agreement (Hoveyda et al., 2018).

629

### 630 **Plasmid constructions**

631 FLAG-FFA2 was generated by amplification of mouse FFA2 plasmid using primers  
632 containing restriction sequences recognized by *Xba*I and *Afe*I and ligated with FLAG-  
633 LHR/pcDNA3.1 digested with *Xba*I and *Afe*I restriction sites. SEP-FFA2 was  
634 generated by subcloning SEP from SEP-LHR using *Xba*I and *Afe*I site and ligated to  
635 FFA2. All constructs used in the present study were verified by nucleotide sequence  
636 analysis.

637

### 638 **Cell Culture, transfections and stable cell lines**

639 STC-1 and WT or  $\beta$ -ARR 1/2 KO HEK 293 cells were maintained in DMEM containing  
640 10% FBS and penicillin/streptomycin (100 U/mL) at 37°C in 5% CO<sub>2</sub>. For both STC-1  
641 or HEK 293 cells, transient transfections of plasmids were performed using  
642 Lipofectamine 2000 (Invitrogen) and cells were assayed 72 h post-transfection.  
643 Transfection of siRNA was performed using RNAiMAX (Invitrogen) and cells were  
644 assayed 96 h post-transfection. To generate FLAG-FFA2 and SEP-FFA2 stable cell  
645 lines, FLAG- or SEP- FFA2 was transfected in HEK 293 cells cultured in the presence  
646 of 0.5  $\mu\text{g}/\text{mL}$  of geneticin.

647

### 648 **Signaling Assays**

649 Intracellular cAMP and IP<sub>1</sub> was determined by HTRF (cAMP Dynamic 2 and IP-one,  
650 respectively (CisBio)). For the measurement of intracellular cAMP, cells or colonic  
651 crypts were pre-treated with IBMX (0.5 mM, 5 min) prior to ligand stimulation (5 min).

652 Measurement of IP<sub>1</sub> was carried by incubating cells or colonic crypts with ligands in  
653 serum free media supplemented with 50 mM LiCL (2h). All cAMP and IP<sub>1</sub>  
654 concentrations were corrected for protein levels. Calcium mobilization was measured  
655 by Fluo4-AM Direct Calcium Assay Kit (Invitrogen). Cells or colonic crypts were  
656 incubated with calcium dye in phenol red and serum free media for 30 min at 37°C  
657 and then at room temperature for 30 min. Cells or colonic crypts were imaged live  
658 using Leica SP5 confocal microscope using a 20X dry objective and a 488nm  
659 excitation laser. Movies were recorded at 1 frame per second for 1 min prior to ligand  
660 addition and a further 10-20 min following ligand addition to allow for calcium levels to  
661 lower to basal. For the measurement of p38 activation by western blot, STC-1 cells  
662 were serum-starved for 2 h prior to ligand stimulation. Following ligand stimulation,  
663 cells were rapidly washed in cold PBS and harvested with lysis buffer (1% Triton X-  
664 100, 50 mM Tris-HCl (pH 7.4), 150 mM NaCl, 0.5 mM EDTA, 1 mM NaF, 1 mM NaVO<sub>3</sub>  
665 and a protease inhibitor tablet (Roche)). Cell extracts were separated on a 12% Tris-  
666 glycine polyacrylamide gel and transferred to a nitrocellulose membrane blotted with  
667 phospho-p38 MAPK antibody or p38 MAPK (Cell Signaling) as a loading control.  
668 Signal densities were quantified with ImageJ. Pre-treatments with either Ptx,  
669 YM-254890, Dyngo-4A or SB 203580 were carried out by incubating cells or colonic  
670 crypts for 20 h with 200 ng/mL Ptx, 5 min with 10 μM YM-254890, 45 min with 50 μM  
671 Dyngo-4a or 10 min with 5 μM SB 203580 before the addition of ligands. Experiments  
672 were conducted in duplicates for calcium mobilization and triplicates for all other  
673 experiments and were repeated at least three times.

674

675 **GLP-1 secretion assays**

676 Plated STC-1 cells and colonic crypts were washed with secretion buffer (HBSS  
677 supplemented 1% BSA fatty acid free, which was adjusted to pH 7.4 with NaOH) and  
678 incubated in secretion buffer containing ligands for 2 h for STC-1 cells and 1 h for  
679 colonic crypts at 37°C. Inhibitors were used as for signaling assays. Following  
680 incubation, cell supernatants were collected, and the cells were lysed with lysis buffer  
681 (0.25 g sodium deoxycholate monohydrate, 0.88g NaCl, 0.5mL Igepal, 80 mM Tris  
682 HCL, pH 8, 1 tablet of complete EDTA-free protease cocktail inhibitor (Roche)).  
683 Samples were analyzed for GLP-1 secretion via an established in-house  
684 radioimmunoassay (Kreymann et al., 1987). The GLP-1 antibody has 100% cross-  
685 reactivity with all amidated forms of GLP-1 but does not cross-react with glycine  
686 extended forms. The intra-assay coefficients of variation for GLP-1 were 5.6%. As a  
687 control of GLP-1 release in the presence of inhibitors, cells or colonic crypts in the  
688 absence of inhibitors that secreted GLP-1 equivalent or less than NaCl were excluded  
689 from further analysis. All experiments were conducted in duplicate for colonic crypts  
690 and triplicate for STC-1 cells and repeated at least 3 times.

691

## 692 **Flow cytometry**

693 Flow cytometry was used to quantitate internalization of FFA2 by measuring levels of  
694 receptor loss from the surface. Cells were fed live with M1 anti-FLAG antibody (20  
695 min, 37°C) prior to treatment with ligands. Cells were then washed, lifted with PBS  
696 containing 2% FBS, centrifuged, and cell pellet washed with PBS and incubated with  
697 Alexa Fluor 488 secondary antibody (1h, 4°C). The fluorescence intensity of 10,000  
698 cells were collected for each treatment and performed in triplicate using a FACS  
699 Calibur flow cytometer (BD Biosciences). Cells that were not exposed to any

700 antibodies or secondary antibody alone were used for controls. All experiments were  
701 conducted at least three times.

702

### 703 **Immunofluorescence and confocal imaging**

704 Receptor imaging in live or fixed cells were conducted by incubating live cells with  
705 FLAG M1-antibody (20 min, 37°C) and then with fluorescent secondary antibody (20  
706 min, 37°C for live cell imaging) in phenol-red-free DMEM prior to agonist treatment. If  
707 inhibitors were used these were administered to the cells at appropriate time before  
708 ligand stimulation. To fix cells, cells were washed three times in PBS/0.04% EDTA to  
709 remove FLAG antibody bound to surface receptors prior to fixation with 4%  
710 paraformaldehyde in PBS (20 min), blocked with 2% FBS (1 h), permeabilized using  
711 0.2% TritonX100, incubated with primary antibody (EEA1 or APPL1 (Cell Signaling) 1  
712 h), washed and subsequently incubated with goat anti- mouse or rabbit Alexa Fluor  
713 secondary antibodies (Invitrogen) (1 h) at RT. Cells were washed again and mounted  
714 with Fluoromount-G (Thermo Fisher). Both live and fixed cells were visualized via a  
715 TCS-SP5 microscope (Leica) with a 63x oil-immersion objective and 1.4 numerical  
716 aperture (NA). Images were acquired using Leica LAS AF image acquisition software.  
717 Raw-image file were analyzed using ImageJ or LAS AF Lite (Leica) to measure  
718 endosomes diameter size or level of co-localization.

719

### 720 **TIRFM**

721 Cells were imaged using the Elyra PS.1 AxioObserver Z1 motorized inverted  
722 microscope with a sCMOS or EMCCD camera and an alpha Plan-Apochromat  
723 100x/1.46 Oil DIC M27 Elyra objective (Zeiss), with solid-state lasers of 488 nm, 561  
724 nm and/642 nm as light sources. For live cell imaging, approximately 15 minutes prior

725 to imaging, culture media was replaced with Opti-MEM reduced serum media  
726 supplemented with HEPES. Imaging was then carried out using a Zeiss Elyra PS.1  
727 microscope controlled at 37°C with 5% CO<sub>2</sub>. Time-lapse movies of whole cells were  
728 taken for 60 seconds, at 10 frames per second (fps) using Zen lite acquisition software.  
729 Fixed cells were prepared as for confocal imaging.

730

### 731 **Statistical analysis**

732 Data are given as mean ± SEM. Mann-Whitney t-test, one-way ANOVA followed by  
733 Dunnett's post-test, or two-way ANOVA followed by Bonferroni post-test was used  
734 when comparing two groups, more than two groups or at least two groups under  
735 multiple conditions, respectively. Statistical significance was determined using  
736 GraphPad Prism. The number of samples (n) has been indicated for each figure panel.  
737 Differences were considered significant  $p \leq 0.05$ .

738

### 739 **ABBREVIATIONS**

740 APPL1, adaptor protein containing PH domain, PTB domain and leucine zipper motif;  
741 B2AR,  $\beta$ 2-adrenergic receptor; Cmp1, compound 1; DMEM, Dulbecco's modified  
742 eagles medium; EE, early endosome; EEA1, early endosome antigen 1; FFA2, free  
743 fatty acid receptor 2; FFA3, free fatty acid receptor 3; GAPDH, glyceraldehyde 3-  
744 phosphate dehydrogenase; GPCR, G protein-coupled receptor; LHR, luteinizing  
745 hormone receptor; Ptx, pertussis toxin; RIA, radio-immunoassay; SEP, super ecliptic  
746 pHluorin; SCFA, short chain fatty acid; TIRFM, total internal reflection fluorescent  
747 microscopy; VEE, very early endosome.



## 748 References

- 749 ALKHATIB, G., LOCATI, M., KENNEDY, P. E., MURPHY, P. M. & BERGER, E. A.  
750 1997. HIV-1 coreceptor activity of CCR5 and its inhibition by chemokines:  
751 independence from G protein signaling and importance of coreceptor  
752 downmodulation. *Virology*, 234, 340-8.
- 753 ANG, Z., XIONG, D., WU, M. & DING, J. L. 2018. FFAR2-FFAR3 receptor  
754 heteromerization modulates short-chain fatty acid sensing. *FASEB journal :  
755 official publication of the Federation of American Societies for Experimental  
756 Biology*, 32, 289-303.
- 757 ARIDOR, M., RAJMILEVICH, G., BEAVEN, M. A. & SAGI-EISENBERG, R. 1993.  
758 Activation of exocytosis by the heterotrimeric G protein Gi3. *Science*, 262,  
759 1569-72.
- 760 BOLOGNINI, D., MOSS, C. E., NILSSON, K., PETERSSON, A. U., DONNELLY, I.,  
761 SERGEEV, E., KONIG, G. M., KOSTENIS, E., KUROWSKA-STOLARSKA,  
762 M., MILLER, A., DEKKER, N., TOBIN, A. B. & MILLIGAN, G. 2016. A Novel  
763 Allosteric Activator of Free Fatty Acid 2 Receptor Displays Unique Gi-  
764 functional Bias. *J Biol Chem*, 291, 18915-31.
- 765 BROWN, A. J., GOLDSWORTHY, S. M., BARNES, A. A., EILERT, M. M.,  
766 TCHEANG, L., DANIELS, D., MUIR, A. I., WIGGLESWORTH, M. J.,  
767 KINGHORN, I., FRASER, N. J., PIKE, N. B., STRUM, J. C., STEPLEWSKI, K.  
768 M., MURDOCK, P. R., HOLDER, J. C., MARSHALL, F. H., SZEKERES, P.  
769 G., WILSON, S., IGNAR, D. M., FOORD, S. M., WISE, A. & DOWELL, S. J.  
770 2003. The Orphan G protein-coupled receptors GPR41 and GPR43 are  
771 activated by propionate and other short chain carboxylic acids. *J Biol Chem*,  
772 278, 11312-9.
- 773 CAENGPRASATH, N. & HANYALOGLU, A. C. 2019. Hardwiring wire-less networks:  
774 spatially encoded GPCR signaling in endocrine systems. *Curr Opin Cell Biol*,  
775 57, 77-82.
- 776 CHAMBERS, E. S., BYRNE, C. S., MORRISON, D. J., MURPHY, K. G., PRESTON,  
777 T., TEDFORD, C., GARCIA-PEREZ, I., FOUNTANA, S., SERRANO-  
778 CONTRERAS, J. I., HOLMES, E., REYNOLDS, C. J., ROBERTS, J. F.,  
779 BOYTON, R. J., ALTMANN, D. M., MCDONALD, J. A. K., MARCHESI, J. R.,  
780 AKBAR, A. N., RIDDELL, N. E., WALLIS, G. A. & FROST, G. S. 2019. Dietary  
781 supplementation with inulin-propionate ester or inulin improves insulin  
782 sensitivity in adults with overweight and obesity with distinct effects on the gut  
783 microbiota, plasma metabolome and systemic inflammatory responses: a  
784 randomised cross-over trial. *Gut*, 68, 1430-1438.
- 785 CHAMBERS, E. S., VIARDOT, A., PSICHAS, A., MORRISON, D. J., MURPHY, K.  
786 G., ZAC-VARGHESE, S. E., MACDOUGALL, K., PRESTON, T., TEDFORD,  
787 C., FINLAYSON, G. S., BLUNDELL, J. E., BELL, J. D., THOMAS, E. L., MT-  
788 ISA, S., ASHBY, D., GIBSON, G. R., KOLIDA, S., DHILLO, W. S., BLOOM, S.  
789 R., MORLEY, W., CLEGG, S. & FROST, G. 2015. Effects of targeted delivery  
790 of propionate to the human colon on appetite regulation, body weight  
791 maintenance and adiposity in overweight adults. *Gut*, 64, 1744-54.
- 792 DEN BESTEN, G., VAN EUNEN, K., GROEN, A. K., VENEMA, K., REIJNGOUD, D.  
793 J. & BAKKER, B. M. 2013. The role of short-chain fatty acids in the interplay  
794 between diet, gut microbiota, and host energy metabolism. *J Lipid Res*, 54,  
795 2325-40.

- 796 EICHEL, K., JULLIE, D. & VON ZASTROW, M. 2016.  $\beta$ -Arrestin drives MAP kinase  
797 signalling from clathrin-coated structures after GPCR dissociation. *Nat Cell*  
798 *Biol*, 18, 303-10.
- 799 EICHEL, K. & VON ZASTROW, M. 2018. Subcellular Organization of GPCR  
800 Signaling. *Trends Pharmacol Sci*, 39, 200-208.
- 801 FULLER, M., PRIYADARSHINI, M., GIBBONS, S. M., ANGUEIRA, A. R.,  
802 BRODSKY, M., HAYES, M. G., KOVATCHEVA-DATCHARY, P., BÄCKHED,  
803 F., GILBERT, J. A., LOWE, W. L., JR. & LAYDEN, B. T. 2015. The short-  
804 chain fatty acid receptor, FFA2, contributes to gestational glucose  
805 homeostasis. *American journal of physiology. Endocrinology and metabolism*,  
806 309, E840-E851.
- 807 GAO, Z. G. & JACOBSON, K. A. 2016. On the selectivity of the Galphaq inhibitor  
808 UBO-QIC: A comparison with the Galphai inhibitor pertussis toxin. *Biochem*  
809 *Pharmacol*, 107, 59-66.
- 810 GE, B., GRAM, H., DI PADOVA, F., HUANG, B., NEW, L., ULEVITCH, R. J., LUO,  
811 Y. & HAN, J. 2002. MAPKK-independent activation of p38alpha mediated by  
812 TAB1-dependent autophosphorylation of p38alpha. *Science*, 295, 1291-4.
- 813 GORVIN, C. M., ROGERS, A., HASTOY, B., TARASOV, A. I., FROST, M.,  
814 SPOSINI, S., INOUE, A., WHYTE, M. P., RORSMAN, P., HANYALOGLU, A.  
815 C., BREITWIESER, G. E. & THAKKER, R. V. 2018. AP2? Mutations Impair  
816 Calcium-Sensing Receptor Trafficking and Signaling, and Show an  
817 Endosomal Pathway to Spatially Direct G-Protein Selectivity. *Cell Rep*, 22,  
818 1054-1066.
- 819 GRIMSEY, N. J., AGUILAR, B., SMITH, T. H., LE, P., SOOHOO, A. L.,  
820 PUTHENVEEDU, M. A., NIZET, V. & TREJO, J. 2015. Ubiquitin plays an  
821 atypical role in GPCR-induced p38 MAP kinase activation on endosomes. *J*  
822 *Cell Biol*, 210, 1117-31.
- 823 GRUNDMANN, M., MERTEN, N., MALFACINI, D., INOUE, A., PREIS, P., SIMON,  
824 K., RUTTIGER, N., ZIEGLER, N., BENKEL, T., SCHMITT, N. K., ISHIDA, S.,  
825 MULLER, I., REHER, R., KAWAKAMI, K., INOUE, A., RICK, U., KUHL, T.,  
826 IMHOF, D., AOKI, J., KONIG, G. M., HOFFMANN, C., GOMEZA, J., WESS,  
827 J. & KOSTENIS, E. 2018. Lack of beta-arrestin signaling in the absence of  
828 active G proteins. *Nat Commun*, 9, 341.
- 829 HANYALOGLU, A. C. 2018. Advances in Membrane Trafficking and Endosomal  
830 Signaling of G Protein-Coupled Receptors. *Int Rev Cell Mol Biol*, 339, 93-131.
- 831 HAUGE, M., EKBERG, J. P., ENGELSTOFT, M. S., TIMSHEL, P., MADSEN, A. N. &  
832 SCHWARTZ, T. W. 2017. Gq and Gs signaling acting in synergy to control  
833 GLP-1 secretion. *Mol Cell Endocrinol*, 449, 64-73.
- 834 HOVEYDA, H. R., FRASER, G. L., ZOUTE, L., DUTHEUIL, G., SCHILS, D.,  
835 BRANTIS, C., LAPIN, A., PARCQ, J., GUITARD, S., LENOIR, F.,  
836 BOUSMAQUI, M. E., RORIVE, S., HOSPIED, S., BLANC, S., BERNARD, J.,  
837 OOMS, F., MCNELIS, J. C. & OLEFSKY, J. M. 2018. N-Thiazolylamide-based  
838 free fatty-acid 2 receptor agonists: Discovery, lead optimization and  
839 demonstration of off-target effect in a diabetes model. *Bioorg Med Chem*, 26,  
840 5169-5180.
- 841 HUDSON, B. D., DUE-HANSEN, M. E., CHRISTIANSEN, E., HANSEN, A. M.,  
842 MACKENZIE, A. E., MURDOCH, H., PANDEY, S. K., WARD, R. J.,  
843 MARQUEZ, R., TIKHONOVA, I. G., ULVEN, T. & MILLIGAN, G. 2013.  
844 Defining the molecular basis for the first potent and selective orthosteric  
845 agonists of the FFA2 free fatty acid receptor. *J Biol Chem*, 288, 17296-312.

- 846 JAMES, S. L., MUIR, J. G., CURTIS, S. L. & GIBSON, P. R. 2003. Dietary fibre: a  
847 roughage guide. *Intern Med J*, 33, 291-6.
- 848 JEAN-ALPHONSE, F., BOWERSOX, S., CHEN, S., BEARD, G., PUTHENVEEDU,  
849 M. A. & HANYALOGLU, A. C. 2014. Spatially restricted G protein-coupled  
850 receptor activity via divergent endocytic compartments. *J Biol Chem*, 289,  
851 3960-77.
- 852 KOMATSU, M., SCHERMERHORN, T., AIZAWA, T. & SHARP, G. W. 1995.  
853 Glucose stimulation of insulin release in the absence of extracellular Ca<sup>2+</sup>  
854 and in the absence of any increase in intracellular Ca<sup>2+</sup> in rat pancreatic  
855 islets. *Proc Natl Acad Sci U S A*, 92, 10728-32.
- 856 KREYMANN, B., WILLIAMS, G., GHATEI, M. A. & BLOOM, S. R. 1987. Glucagon-  
857 like peptide-1 7-36: a physiological incretin in man. *Lancet*, 2, 1300-4.
- 858 LE POUL, E., LOISON, C., STRUYF, S., SPRINGAEL, J. Y., LANNOY, V.,  
859 DECOBECQ, M. E., BREZILLON, S., DUPRIEZ, V., VASSART, G., VAN  
860 DAMME, J., PARMENTIER, M. & DETHEUX, M. 2003. Functional  
861 characterization of human receptors for short chain fatty acids and their role in  
862 polymorphonuclear cell activation. *J Biol Chem*, 278, 25481-9.
- 863 LEE, T., SCHWANDNER, R., SWAMINATH, G., WEISZMANN, J., CARDOZO, M.,  
864 GREENBERG, J., JAECKEL, P., GE, H., WANG, Y., JIAO, X., LIU, J.,  
865 KAYSER, F., TIAN, H. & LI, Y. 2008. Identification and functional  
866 characterization of allosteric agonists for the G protein-coupled receptor  
867 FFA2. *Mol Pharmacol*, 74, 1599-609.
- 868 LI, M., VAN ESCH, B., HENRICKS, P. A. J., FOLKERTS, G. & GARSSSEN, J. 2018.  
869 The Anti-inflammatory Effects of Short Chain Fatty Acids on  
870 Lipopolysaccharide- or Tumor Necrosis Factor alpha-Stimulated Endothelial  
871 Cells via Activation of GPR41/43 and Inhibition of HDACs. *Front Pharmacol*,  
872 9, 533.
- 873 LIOU, A. P., PAZIUK, M., LUEVANO, J. M., JR., MACHINENI, S., TURNBAUGH, P.  
874 J. & KAPLAN, L. M. 2013. Conserved shifts in the gut microbiota due to  
875 gastric bypass reduce host weight and adiposity. *Sci Transl Med*, 5, 178ra41.
- 876 LIU, S. H., HUANG, Y. W., WU, C. T., CHIU, C. Y. & CHIANG, M. T. 2013. Low  
877 molecular weight chitosan accelerates glucagon-like peptide-1 secretion in  
878 human intestinal endocrine cells via a p38-dependent pathway. *J Agric Food  
879 Chem*, 61, 4855-61.
- 880 MASLOWSKI, K. M., VIEIRA, A. T., NG, A., KRANICH, J., SIERRA, F., YU, D.,  
881 SCHILTER, H. C., ROLPH, M. S., MACKAY, F., ARTIS, D., XAVIER, R. J.,  
882 TEIXEIRA, M. M. & MACKAY, C. R. 2009. Regulation of inflammatory  
883 responses by gut microbiota and chemoattractant receptor GPR43. *Nature*,  
884 461, 1282-6.
- 885 MCCLUSKEY, A., DANIEL, J. A., HADZIC, G., CHAU, N., CLAYTON, E. L.,  
886 MARIANA, A., WHITING, A., GORGANI, N. N., LLOYD, J., QUAN, A.,  
887 MOSHKANBARYANS, L., KRISHNAN, S., PERERA, S., CHIRCOP, M., VON  
888 KLEIST, L., MCGEACHIE, A. B., HOWES, M. T., PARTON, R. G.,  
889 CAMPBELL, M., SAKOFF, J. A., WANG, X., SUN, J. Y., ROBERTSON, M. J.,  
890 DEANE, F. M., NGUYEN, T. H., MEUNIER, F. A., COUSIN, M. A. &  
891 ROBINSON, P. J. 2013. Building a better dynasore: the dyngo compounds  
892 potently inhibit dynamin and endocytosis. *Traffic*, 14, 1272-89.
- 893 MIESENBOCK, G., DE ANGELIS, D. A. & ROTHMAN, J. E. 1998. Visualizing  
894 secretion and synaptic transmission with pH-sensitive green fluorescent  
895 proteins. *Nature*, 394, 192-5.

- 896 OLKEN, N. M. & MARLETTA, M. A. 1992. NG-allyl- and NG-cyclopropyl-L-arginine:  
897 two novel inhibitors of macrophage nitric oxide synthase. *J Med Chem*, 35,  
898 1137-44.
- 899 PINGITORE, A., GONZALEZ-ABUIN, N., RUZ-MALDONADO, I., HUANG, G. C.,  
900 FROST, G. & PERSAUD, S. J. 2019. Short chain fatty acids stimulate insulin  
901 secretion and reduce apoptosis in mouse and human islets in vitro: Role of  
902 free fatty acid receptor 2. *Diabetes Obes Metab*, 21, 330-339.
- 903 PSICHAS, A., SLEETH, M. L., MURPHY, K. G., BROOKS, L., BEWICK, G. A.,  
904 HANYALOGLU, A. C., GHATEI, M. A., BLOOM, S. R. & FROST, G. 2015.  
905 The short chain fatty acid propionate stimulates GLP-1 and PYY secretion via  
906 free fatty acid receptor 2 in rodents. *Int J Obes (Lond)*, 39, 424-9.
- 907 REIMER, R. A. 2006. Meat hydrolysate and essential amino acid-induced glucagon-  
908 like peptide-1 secretion, in the human NCI-H716 enteroendocrine cell line, is  
909 regulated by extracellular signal-regulated kinase1/2 and p38 mitogen-  
910 activated protein kinases. *The Journal of endocrinology*, 191, 159-170.
- 911 ROMAN, G., VLAHAKIS, J. Z., VUKOMANOVIC, D., NAKATSU, K. & SZAREK, W.  
912 A. 2010. Heme oxygenase inhibition by 1-aryl-2-(1h-imidazol-1-yl/1h-1,2,4-  
913 triazol-1-yl)ethanones and their derivatives. *ChemMedChem*, 5, 1541-55.
- 914 RUTTING, S., XENAKI, D., MALOUF, M., HORVAT, J. C., WOOD, L. G.,  
915 HANSBRO, P. M. & OLIVER, B. G. 2019. Short-chain fatty acids increase  
916 TNFalpha-induced inflammation in primary human lung mesenchymal cells  
917 through the activation of p38 MAPK. *Am J Physiol Lung Cell Mol Physiol*, 316,  
918 L157-I174.
- 919 SATO, Y., NENQUIN, M. & HENQUIN, J. C. 1998. Relative contribution of Ca<sup>2+</sup>-  
920 dependent and Ca<sup>2+</sup>-independent mechanisms to the regulation of insulin  
921 secretion by glucose. *FEBS Lett*, 421, 115-9.
- 922 SPOSINI, S., JEAN-ALPHONSE, F. G., AYOUB, M. A., OQUA, A., WEST, C.,  
923 LAVERY, S., BROSENS, J. J., REITER, E. & HANYALOGLU, A. C. 2017.  
924 Integration of GPCR Signaling and Sorting from Very Early Endosomes via  
925 Opposing APPL1 Mechanisms. *Cell Rep*, 21, 2855-2867.
- 926 SPRECKLEY, E. & MURPHY, K. G. 2015. The L-Cell in Nutritional Sensing and the  
927 Regulation of Appetite. *Front Nutr*, 2, 23.
- 928 TAKASAKI, J., SAITO, T., TANIGUCHI, M., KAWASAKI, T., MORITANI, Y.,  
929 HAYASHI, K. & KOBORI, M. 2004. A novel Galphaq/11-selective inhibitor. *J*  
930 *Biol Chem*, 279, 47438-45.
- 931 TANG, Z., LI, S., HAN, P., YIN, J., GAN, Y., LIU, Q., WANG, J., WANG, C., LI, Y. &  
932 SHI, J. 2015. Pertussis toxin reduces calcium influx to protect ischemic stroke  
933 in a middle cerebral artery occlusion model. *J Neurochem*, 135, 998-1006.
- 934 THOMSEN, A. R. B., JENSEN, D. D., HICKS, G. A. & BUNNETT, N. W. 2018.  
935 Therapeutic Targeting of Endosomal G-Protein-Coupled Receptors. *Trends*  
936 *Pharmacol Sci*, 39, 879-891.
- 937 TIAN, L. & JIN, T. 2016. The incretin hormone GLP-1 and mechanisms underlying its  
938 secretion. *J Diabetes*, 8, 753-765.
- 939 TOLHURST, G., HEFFRON, H., LAM, Y. S., PARKER, H. E., HABIB, A. M.,  
940 DIAKOGIANNAKI, E., CAMERON, J., GROSSE, J., REIMANN, F. &  
941 GRIBBLE, F. M. 2012. Short-chain fatty acids stimulate glucagon-like peptide-  
942 1 secretion via the G-protein-coupled receptor FFAR2. *Diabetes*, 61, 364-71.
- 943 TSVETANOVA, N. G. & VON ZASTROW, M. 2014. Spatial encoding of cyclic AMP  
944 signaling specificity by GPCR endocytosis. *Nat Chem Biol*, 10, 1061-5.

- 945 YONEZAWA, T., KOBAYASHI, Y. & OBARA, Y. 2007. Short-chain fatty acids induce  
946 acute phosphorylation of the p38 mitogen-activated protein kinase/heat shock  
947 protein 27 pathway via GPR43 in the MCF-7 human breast cancer cell line.  
948 *Cell Signal*, 19, 185-93.
- 949 YUDOWSKI, G. A., PUTHENVEEDU, M. A., LEONOUidakis, D., PANICKER, S.,  
950 THORN, K. S., BEATTIE, E. C. & VON ZASTROW, M. 2007. Real-time  
951 imaging of discrete exocytic events mediating surface delivery of AMPA  
952 receptors. *J Neurosci*, 27, 11112-21.
- 953 ZHANG, J., SHUANG SUN, Y., ZHAO, L., CHEN, T., FAN, M., CHAO JIAO, H.,  
954 ZHAO, J., WANG, X., CHANG LI, F., LI, H. & LIN, H. 2019. *SCFAs-induced*  
955 *GLP-1 Secretion Links the Regulation of Gut Microbiome on Hepatic*  
956 *Lipogenesis in Chickens*.  
957
- 958
- 959

960 **FIGURE LEGENDS**

961

962 **Figure 1. Propionate stimulates GLP-1 secretion and activates Gai/o but not**

963 **Gαq/11 via FFA2.** (A-B) Intracellular cAMP levels measured in STC-1 cells (A) or

964 colonic crypts (B) pre-treated with Pertussis toxin (Ptx; 200ng/mL, 20h) prior to pre-

965 treatment with IBMX (0.5 mM, 5 min) and then stimulated with forskolin (FSK, 3 μM)

966 or a combination of FSK with either NaCl or sodium propionate (Pro) (1 mM, 5 min).

967 Data are expressed as % change of FSK treated cells. n = 3 independent experiments.

968 Two-sided Mann-Whitney U test, \*\*\* p < 0.001. (C-D) Intracellular calcium mobilization

969 measured in STC-1 cells (C) or colonic crypts (D). Cultures were incubated with

970 calcium indicator Fluo4-AM for 1 h and imaged live via confocal microscopy for 1 min

971 before the addition of either NaCl (1 mM), sodium propionate (Pro), DMSO, orthosteric

972 FFA2 agonist Cmp1 (10 μM) or allosteric FFA2 agonist 4-CMTB (10 μM). Average

973 maximal intensities of n = 20 cells in duplicate per 6 independent experiments. Two-

974 sided Mann-Whitney U test, \* p < 0.05. (E-F) Intracellular accumulation of IP<sub>1</sub> in STC-

975 1 cells (E) or colonic crypts (F). Cultures were treated with either NaCl, sodium

976 propionate (Pro) (1 mM), DMSO, Cmp1 (10 μM) or 4-CMTB (10 μM) for 2 h. STC-1

977 cells or crypts, n = 3 independent experiments. Two-sided Mann-Whitney U test, \*\*\* p

978 < 0.001. Data represent mean ± SEM. (G) STC-1 cells and (H) colonic crypts were

979 treated with either NaCl, sodium propionate (Pro) (1 mM, 2 h STC-1, 1 h crypts) and

980 total GLP-1 levels secreted was measured via RIA. Data are expressed as fold change

981 of total GLP-1 and normalized to basal (NaCl) secretion within the same experiment.

982 For STC-1 cells, n = 4 independent experiments. For crypts, n = 3 independent

983 experiments. Two-sided Mann-Whitney U test, \* p < 0.05, \*\* p < 0.01. (I) Intracellular

984 cAMP levels measured in colonic crypts from wildtype (WT) or FFA2 knockout mice

985 (FFA2<sup>-/-</sup>) pre-treated with IBMX (0.5 mM, 5 min) and then stimulated as in (C-D). Data  
986 are expressed as % change of FSK/NaCl treated cells. n = 3 independent experiments.  
987 Two-sided Mann-Whitney U test, \*\*\* p < 0.001. (J) Expression levels of FFA3 in WT  
988 and FFA2<sup>-/-</sup> colonic crypts. mRNA isolated from colonic crypts of WT and FFA2<sup>-/-</sup> mice  
989 were used in qPCR studies with specific mouse FFA3 primers. Data are presented as  
990  $\Delta\Delta\text{Ct}$ . Two-sided Mann-Whitney U test. Data represent mean  $\pm$  SEM.

991 **Figure 2. Propionate-dependent Gai/o signaling requires receptor**  
992 **internalization.** (A) Representative confocal microscopy images of HEK 293 cells  
993 expressing FLAG-FFA2 were pre-treated with either DMSO (vehicle) or Dyngo-4a  
994 (50  $\mu\text{M}$ , 45 min), fed with M1 anti-FLAG antibody prior to stimulation with either NaCl  
995 or sodium propionate (Pro) (1 mM, 20 min). Fixed cells were imaged via confocal  
996 microscopy. (B-C) Intracellular cAMP levels (B) or calcium mobilization (C) measured  
997 in HEK 293 cells expressing FLAG-FFA2 pre-treated with either DMSO (vehicle) or  
998 Dyngo-4a (50  $\mu\text{M}$ , 45 min). For (B), cells were pre-treated with IBMX (0.5 mM, 5 min)  
999 and then stimulated with forskolin (FSK, 3  $\mu\text{M}$ ) or a combination of FSK with either  
1000 NaCl or sodium propionate (Pro) (1 mM, 5 min). n = 3 independent experiments. Two-  
1001 sided Mann-Whitney U test, \*\*\* p < 0.001 For (C), cells were incubated with calcium  
1002 indicator Fluo4-AM for 1 h and imaged live via confocal microscopy for 1 min before  
1003 the addition of either NaCl or sodium propionate (Pro) (1 mM). Average maximal  
1004 intensities of n=20 cells in duplicate per 4 independent experiments. (D)  
1005 Representative confocal microscopy images of WT or  $\beta$ -ARR KO HEK 293 cells  
1006 expressing FLAG-FFA2. Cells were treated with FLAG antibody and ligands and  
1007 imaged as in (A). (E-F) Intracellular cAMP levels (E) or calcium mobilization (F)  
1008 measured in WT or  $\beta$ -ARR KO HEK 293 cells transiently expressing FLAG-FFA2.  
1009 Samples were treated and assayed as in (B) and (C). n = 3 independent experiments

1010 for either WT or  $\beta$ -ARR KO HEK 293 cells transiently expressing FLAG-FFA2. Two-  
1011 sided Mann-Whitney U test, \*\*\*  $p < 0.001$  (G) Representative confocal images of STC-  
1012 1 cells transiently expressing FLAG-FFA2 pre-treated with either DMSO (vehicle) or  
1013 Dyngo-4a (50  $\mu$ M, 45 min) then stimulated as in (A). (H) Intracellular cAMP levels of  
1014 STC-1 pre-treated with either DMSO (vehicle) or Dyngo-4a (50  $\mu$ M, 45 min). Scale  
1015 bar, 5  $\mu$ m; scale bar in inset, 1  $\mu$ m.  $n = 3$  independent experiments. Two-sided Mann-  
1016 Whitney U test, \*\*\*  $p < 0.001$ . For confocal images, representative images are shown  
1017 of  $\sim 10$  cells/experiment. Data represent mean  $\pm$  SEM.

1018

1019 **Figure 3. FFA2 internalizes to endosomes exhibiting properties of VEEs.** (A) (i)  
1020 Representative confocal microscopy images of HEK 293 cells expressing FLAG-FFA2  
1021 or FLAG- $\beta$ 2AR or STC-1 cells expressing FLAG-FFA2 or FLAG- $\beta$ 2AR imaged live with  
1022 confocal microscopy before and after ligand treatment. FFA2 was stimulated with  
1023 sodium propionate (Pro, 1mM), and  $\beta$ 2AR with isoproterenol (Iso, 10  $\mu$ M) for 20 min.  
1024 Scale bars, 5  $\mu$ m, scale bar in inset 1  $\mu$ m. (ii) Bar graph showing diameter of FFA2 or  
1025  $\beta$ 2AR in HEK 293 or STC-1 cells containing endosomes. Endosome diameter was  
1026 assessed by measuring the diameter of 20 endosomes,  $n = 10$  cells per condition,  
1027 collected across 3 independent experiments. Two-sided Mann-Whitney U test, \*\*\*  $p <$   
1028 0.001. (B) (i) Representative confocal microscopy images of fixed HEK 293 cells stably  
1029 expressing FLAG-FFA2 or  $\beta$ 2AR or STC-1 cells transiently expressing FLAG-FFA2  
1030 treated with ligand for 20 min prior to 'stripping' by PBS/EDTA (to remove surface  
1031 bound FLAG antibody), fixation and stained with anti-EEA1 antibody. Scale bars, 5  
1032  $\mu$ m, scale bar in inset 1  $\mu$ m. (ii) Numbers of FFA2 or  $\beta$ 2AR containing endosomes  
1033 positive for EEA1 quantified from (i); 200 endosomes per condition, 10 cells quantified  
1034 per condition. Data represent mean  $\pm$  SEM,  $n=10$  cells per condition, collected across



1035 3 independent experiments. Two-sided Mann-Whitney U test, \*\*  $p < 0.01$ , ##  $p < 0.01$ .  
1036 (C) FFA2 colocalizes with APPL1. (i) Representative confocal microscopy images of  
1037 fixed HEK 293 cells stably expressing FLAG-FFA2 or LHR or STC-1 cells transiently  
1038 expressing FLAG-FFA2 treated with ligand (LH for LHR). Cells were treated as (B)  
1039 except that cells were stained with anti-APPL1 antibody. Scale bars, 5  $\mu\text{m}$ , scale bar  
1040 in inset 1  $\mu\text{m}$ . (ii) Numbers of FFA2 or LHR containing endosomes positive for APPL1  
1041 quantified from (i); 200 endosomes per condition, 10 cells quantified per condition.  $n$   
1042 = 10 cells per condition, collected across 3 independent experiments. Two-sided  
1043 Mann-Whitney U test, \*\*\*  $p < 0.001$ . For confocal images, representative images are  
1044 shown of ~10 cells/experiment. Data represent mean  $\pm$  SEM.

1045

1046 **Figure 4 FFA2 trafficking and G protein signaling is regulated by APPL1.** (A)  
1047 Representative western blot of total cellular levels of APPL1 from cells transfected  
1048 either with scramble or APPL1 siRNA. GAPDH was used as a loading control. (B)  
1049 Representative confocal microscopy images of propionate-induced internalization and  
1050 recycling following APPL1 siRNA-mediated knockdown. HEK 293 cells stably  
1051 expressing FLAG-FFA2 were labelled with anti-FLAG antibody and then treated with  
1052 NaCl (1 mM) or propionate (pro, 1 mM) for 20 min, then 'stripped' and incubated with  
1053 ligand-free medium for 1h to allow receptor recycling. Scale bars, 5  $\mu\text{m}$ , scale bar in  
1054 inset 1  $\mu\text{m}$ . (C) Recycling of HEK 293 cells stably expressing SEP-FFA2 was  
1055 measured in real-time, via TIRFM, cells were transfected either with scramble or  
1056 APPL1 siRNA and stimulated with NaCl (1 mM) or sodium propionate (Pro, 1 mM) for  
1057 5 min.  $n = 20$  cells per condition, collected across 4 independent experiments. Two-  
1058 sided Mann-Whitney U test, \*\*\*  $p < 0.001$ . (D) APPL1 negatively regulates propionate-  
1059 mediated Gai signaling. HEK 293 cells stably expressing FLAG-FFA2 (i) or STC-1 cells

1060 (ii) transfected with either scramble of APPL1 siRNA prior to pre-treatment of IBMX  
1061 (0.5 mM, 5 min) and then stimulated with forskolin (FSK, 3  $\mu$ M) or a combination of  
1062 FSK and NaCl or stated SCFAs (1 mM, 5 min). Data are expressed as % change of  
1063 FSK and NaCl treatment. n = 4 independent experiments. Two-sided Mann-Whitney  
1064 U test, \* p < 0.05; \*\* p < 0.01. (E) FFA2 colocalizes with G $\alpha_i$  within APPL1 endosomes.  
1065 Representative TIRFM images of HEK 293 cells stably expressing FLAG-FFA2 (red),  
1066 G $\alpha_i$  (green), APPL1 (blue) in cells stimulated either with NaCl (1 mM) or sodium  
1067 propionate (Pro, 1 mM) for 5 min (i). Dotted line marks cell boundary. The lower panel  
1068 shows higher magnification image of the region of colocalization of the white box in  
1069 the upper-panel images. Arrows indicate FFA2 endosomes positive for G $\alpha_i$  only; circle  
1070 indicates FFA2 endosomes positive for G $\alpha_i$  and APPL1; squares indicated FFA2  
1071 endosome positive for APPL1 only. Scale bars of upper-panel images, 10  $\mu$ m, scale  
1072 bar of lower-panel images 3  $\mu$ m. Quantification of FFA2 endosomes positive for either  
1073 G $\alpha_i$ , APPL1 or G $\alpha_i$  and APPL1; n=12 cells per condition from (i) were quantified across  
1074 3 independent experiments (ii). Two-way ANOVA, Bonferroni multiple comparisons  
1075 test, \*\*\* p < 0.001. Data represent mean  $\pm$  SEM.

1076

1077 **Figure 5 Endosomal G $\alpha_i$ /o signaling regulates propionate-mediated GLP-1**  
1078 **release.** Stimulation of GLP-1 release from STC-1 cells (A) or colonic crypts (B) in the  
1079 presence of Ptx. STC-1 cells or colonic crypts were pre-treated with either vehicle or  
1080 Ptx (200 ng/mL, 20 h) prior to stimulation with either NaCl (1 mM) or sodium propionate  
1081 (Pro, 1 mM) for 2 h and 1 h for colonic crypts. For STC-1 cells, n=4 independent  
1082 experiments. For crypts, n=8 independent experiments. Two-sided Mann-Whitney U  
1083 test, \*\*\* p < 0.001. Stimulation of GLP-1 release from STC-1 cells (C) or colonic crypts  
1084 (D) in the presence of G $\alpha_q/11$  inhibitor, YM-254890. STC-1 cells and colonic crypts

1085 were pre-treated with either DMSO or YM-254890 (YM, 10  $\mu$ M, 5 min) and then treated  
1086 as in (A and B). For STC-1 cells, n = 4 independent experiments. For crypts, n=3  
1087 independent experiments. Two-sided Mann-Whitney U test, \* p < 0.05, \*\* p <0.01.  
1088 Stimulation of GLP-1 release from STC-1 cells (D) or colonic crypts (E) in the presence  
1089 of Dyngo-4a. STC-1 cells or colonic crypts were pre-treated with either DMSO or  
1090 Dyngo-4a (50  $\mu$ M, 45 min for STC-1 cells and 100  $\mu$ M, 45 min for colonic crypts),  
1091 following pre-treatment, Dyngo-4a was co-incubated with ligands for an additional 5  
1092 min and then removed. Cells and crypts were treated as (A and B). For STC-1 cells,  
1093 n = 5 independent experiments. For crypts, n = 3 independent experiments. Two-sided  
1094 Mann-Whitney U test, \*\* p < 0.01, \*\*\* p <0.001. Insets show propionate-induced GLP-  
1095 1 release normalized to NaCl GLP-1 release. \*\* p < 0.01, \*\*\* p <0.001. GLP-1 secretion  
1096 of media and cells were detected via RIA and was expressed as fold change of total  
1097 GLP-1 and normalized to NaCl secretion within the same experiment. Data represent  
1098 mean  $\pm$  SEM.

1099

1100 **Figure 6 Endosomal signaling of FFA2 regulates GLP-1 release via activation of**  
1101 **p38.** (A) STC-1 cells were pre-treated with DMSO (vehicle) or Dyngo-4a (50  $\mu$ M,  
1102 45 mins) prior to stimulation with NaCl (1 mM) or propionate (Pro, 1 mM) for 5 or 30  
1103 min. Lysates were incubated with membranes spotted for 43 different phosphokinases  
1104 (R&D systems). (Ai) Membranes highlighting location of kinase phospho-antibodies  
1105 spotted onto the array. Signals of relevant kinases in response to Dyngo-4a effects  
1106 are indicated by numbers. (Aii) Fold changes over NaCl in levels of phosphorylation  
1107 that decreased in presence of Dyngo-4a. Data represent mean  $\pm$  SEM of fold change  
1108 values. (B-C) Representative Western blot demonstrating phosphorylated p38 (P-p38)  
1109 and total p38 (T-p38) of lysates from STC-1 cells with p38 inhibitor, SB 203580 (A),

1110 Dyngo-4a (B), Ptx (C). STC-1 cells were pre-treated with DMSO (vehicle) or SB  
1111 203580 (5  $\mu$ M, 10 min), Dygno-4a (50  $\mu$ M, 45 min), Ptx (200 ng/mL, 20 hours) prior to  
1112 stimulation of NaCl (1 mM) or propionate (Pro, 1 mM) at the indicated time points. Cell  
1113 lysates were then collected for Western blot analysis and probed for P-p38.  
1114 Membranes were then stripped and re-probed with t-p38 which was used as a loading  
1115 control (i). Densitometry and fold change analysis of P-p38 normalized to total-p38 of  
1116 lysates pre-treated with control, Ptx, or SB 203580. Fold change of densitometry  
1117 analysis of P-p38 levels normalized to NaCl of control or inhibitor at each time point  
1118 stimulation with total-p38 (ii). Stimulation of GLP-1 release from STC-1 cells (D) or  
1119 colonic crypts (E) in the presence of SB 203580. Both were pre-treated either with  
1120 DMSO or SB 203580 (5  $\mu$ M, 10 min), prior to stimulation with either NaCl (1 mM) or  
1121 sodium propionate (Pro, 1 mM) for 2 h for STC-1 cells and 1 h for colonic crypts. For  
1122 STC-1 cells, n = 3 independent experiments. For crypts, n=3 independent  
1123 experiments. Two-sided Mann-Whitney U test, \*\*\* p < 0.001. Insets show propionate-  
1124 induced GLP-1 release normalized to NaCl-induced GLP-1 release. \*\* p < 0.01, \*\*\* p  
1125 <0.001. GLP-1 secretion of media and cells detected via RIA and was expressed as  
1126 fold change of total GLP-1 and normalized to NaCl secretion within the same  
1127 experiment. Data represents mean  $\pm$  SEM.

1128

1129

1130

1131

1132

1133

1134

**A**

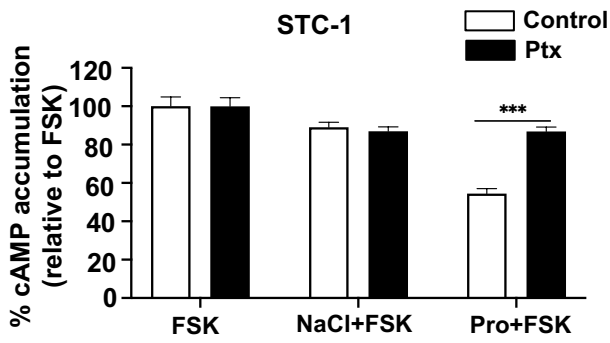

**B**

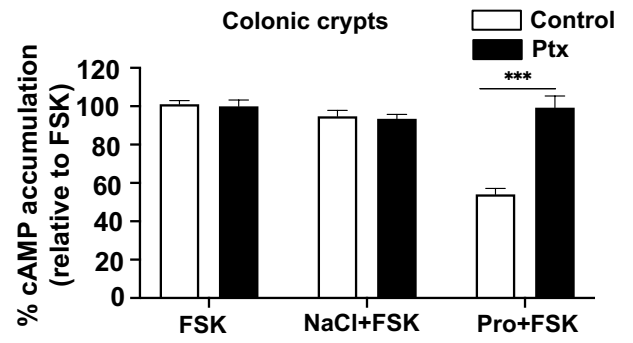

**C**

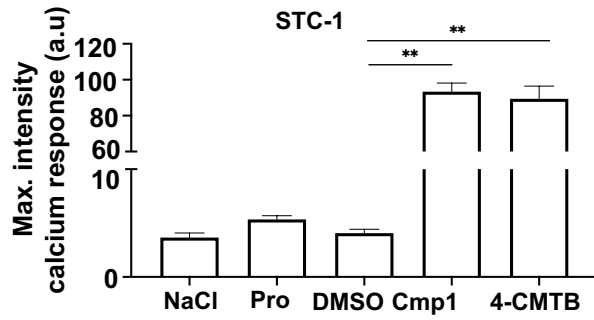

**D**

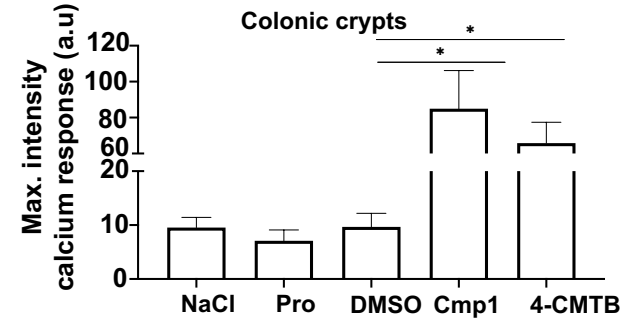

**E**

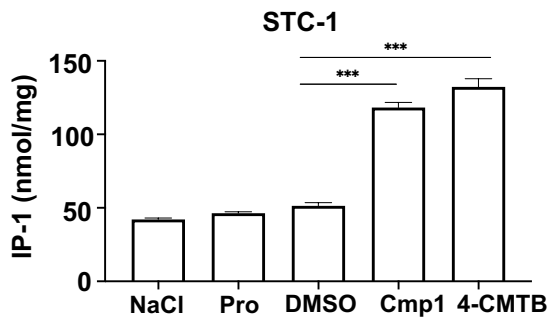

**F**

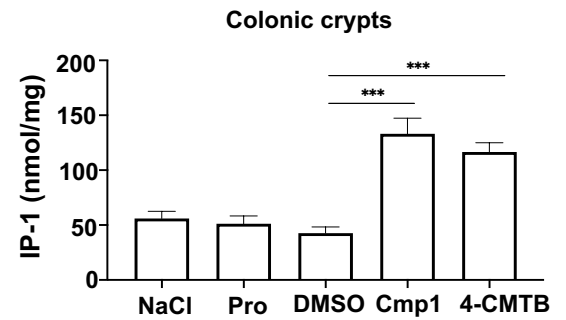

**G**

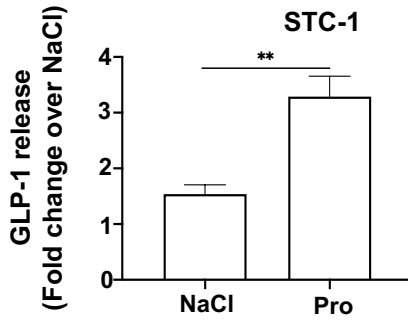

**H**

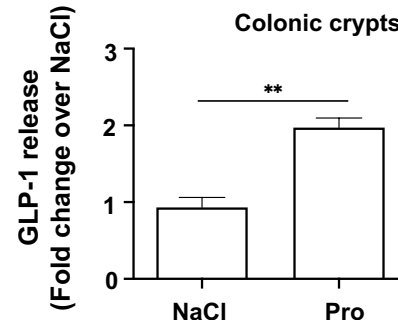

**I**

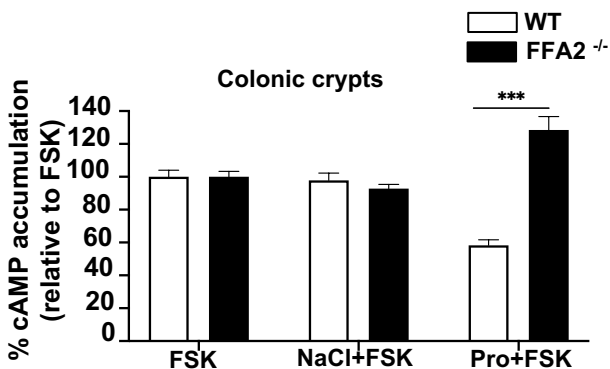

**J**

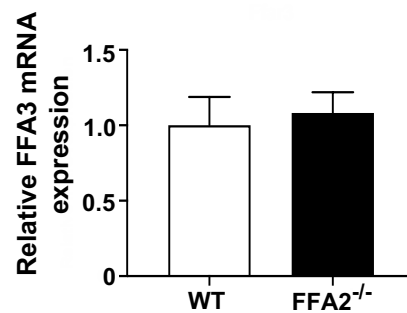

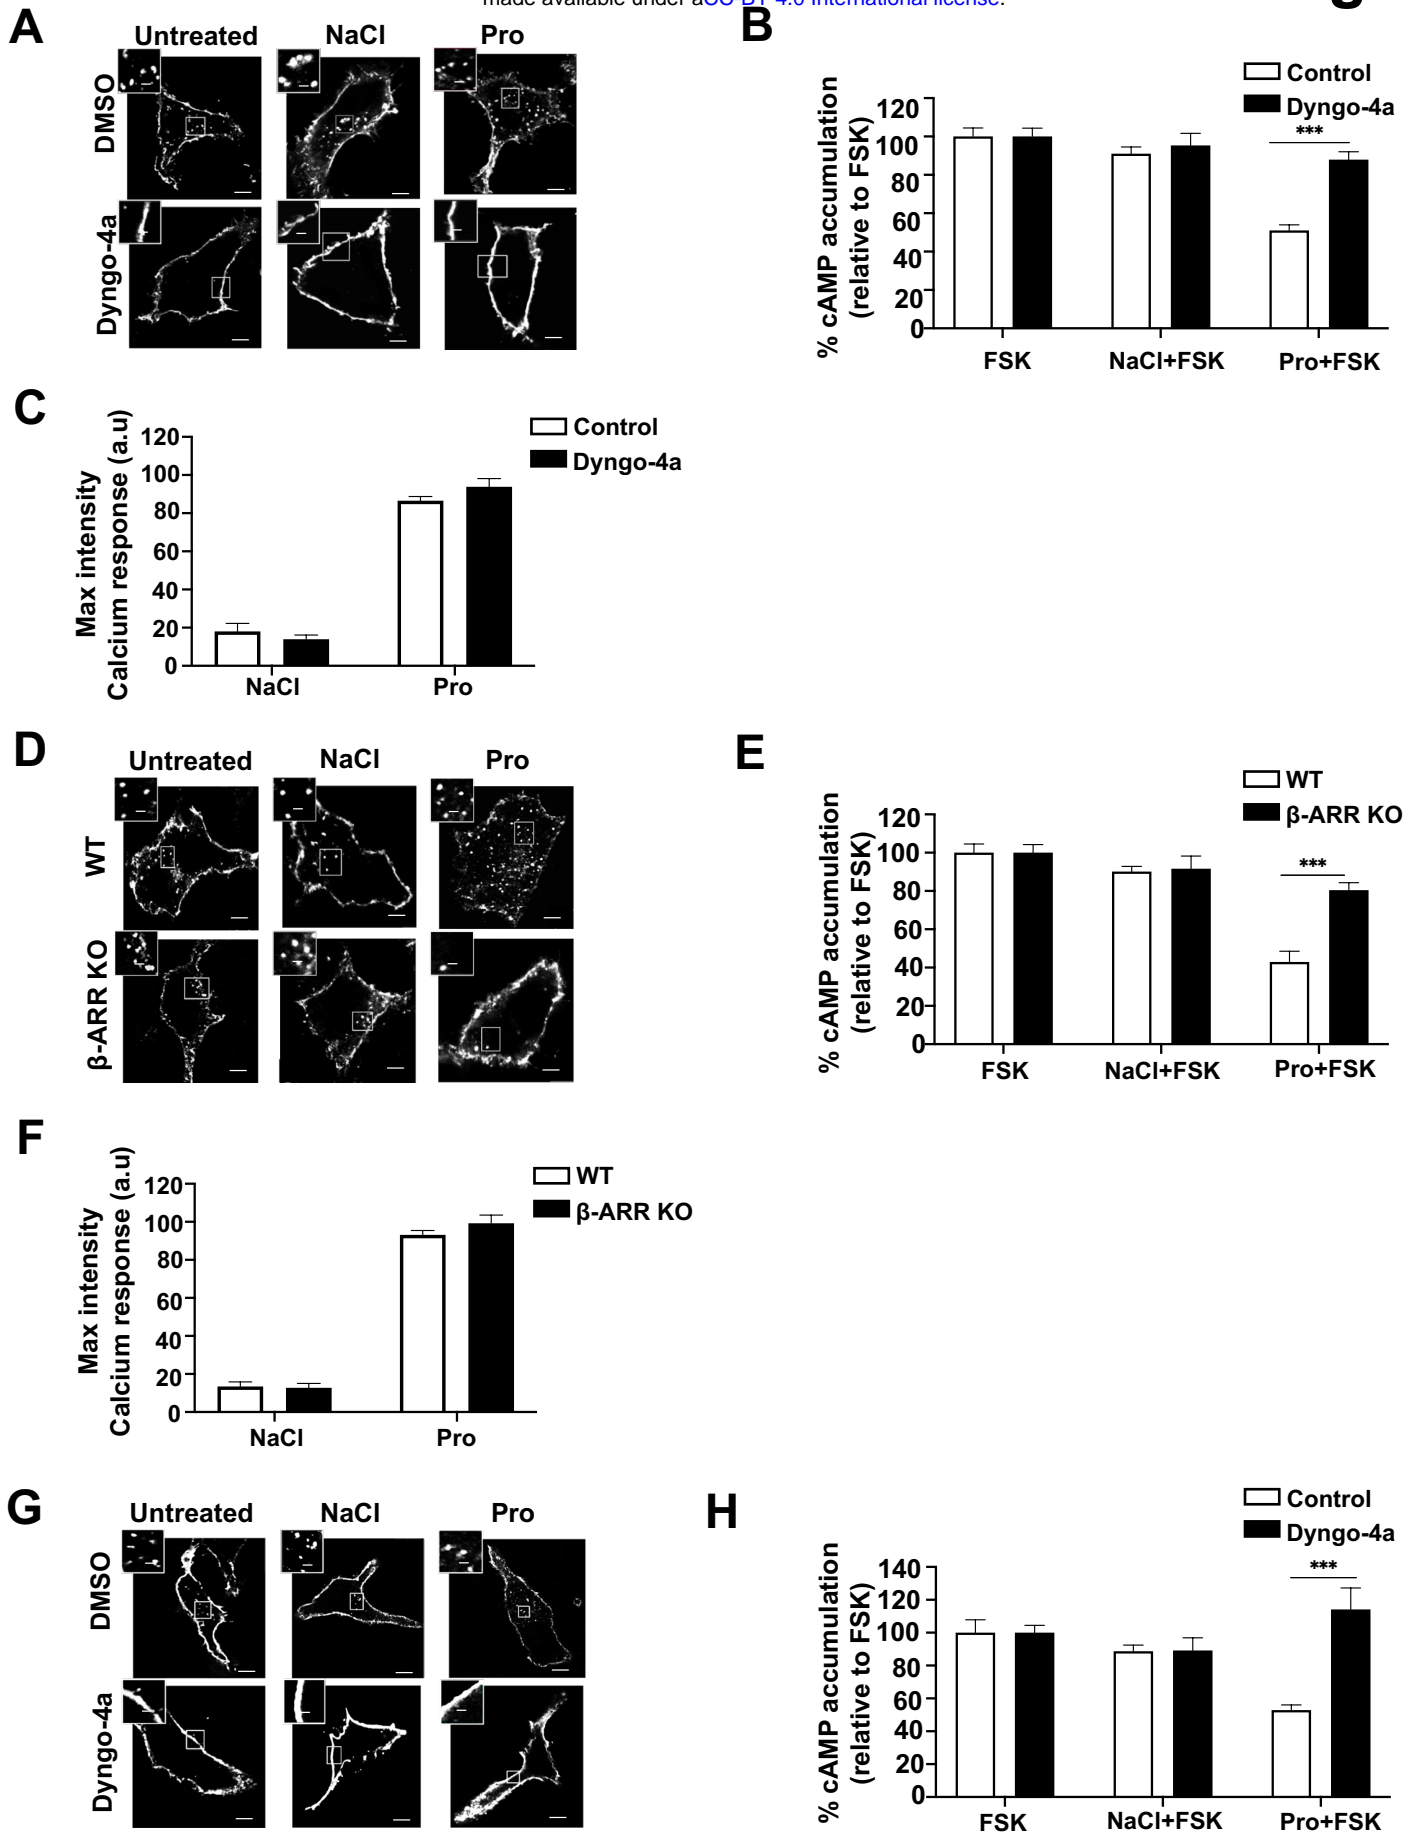

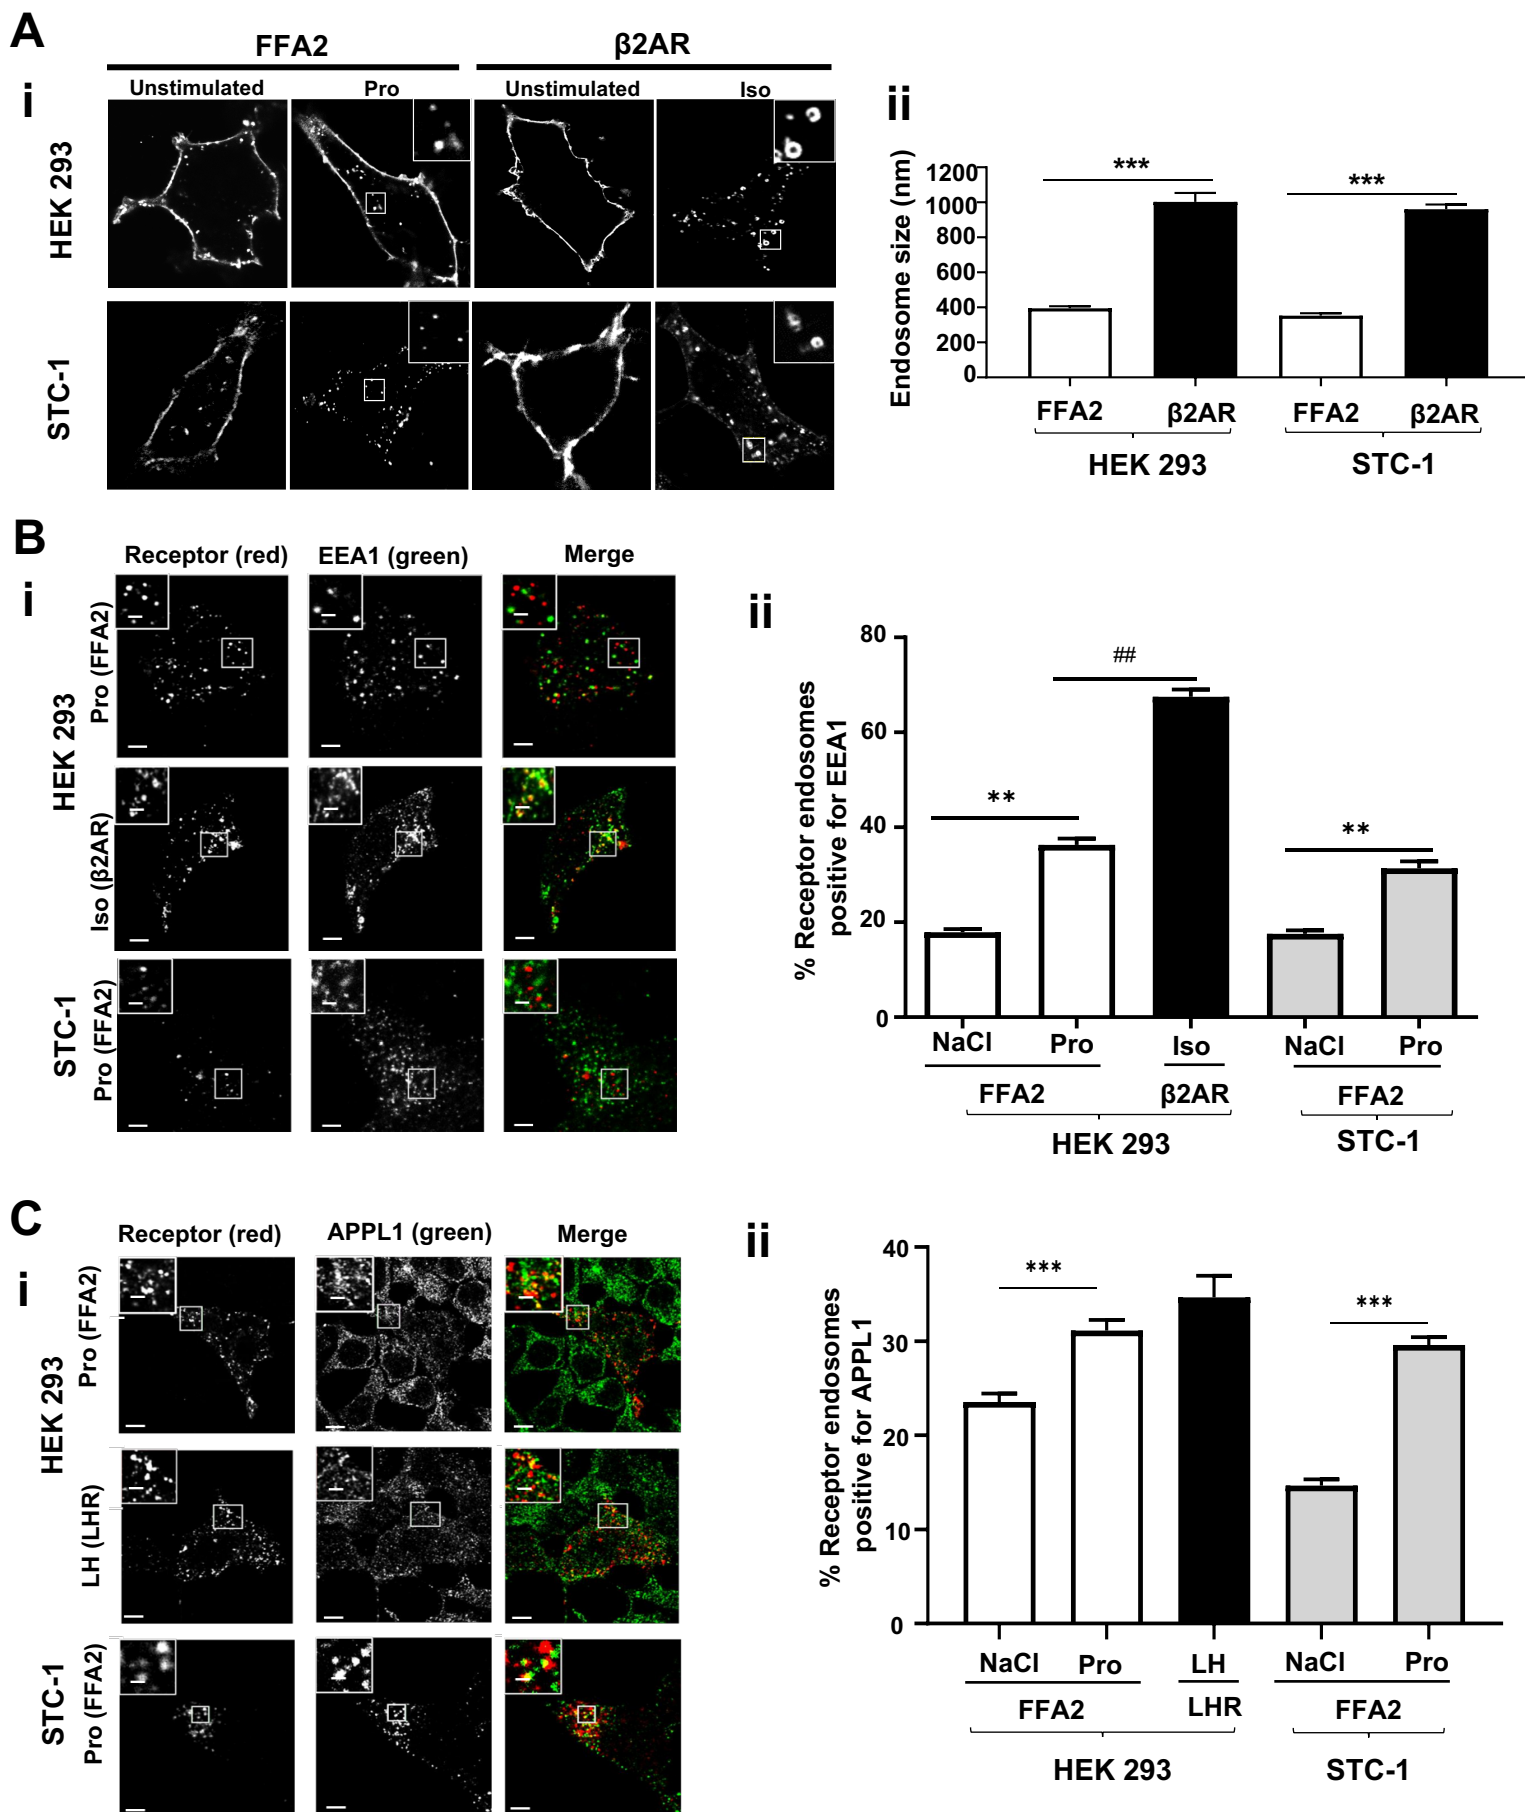

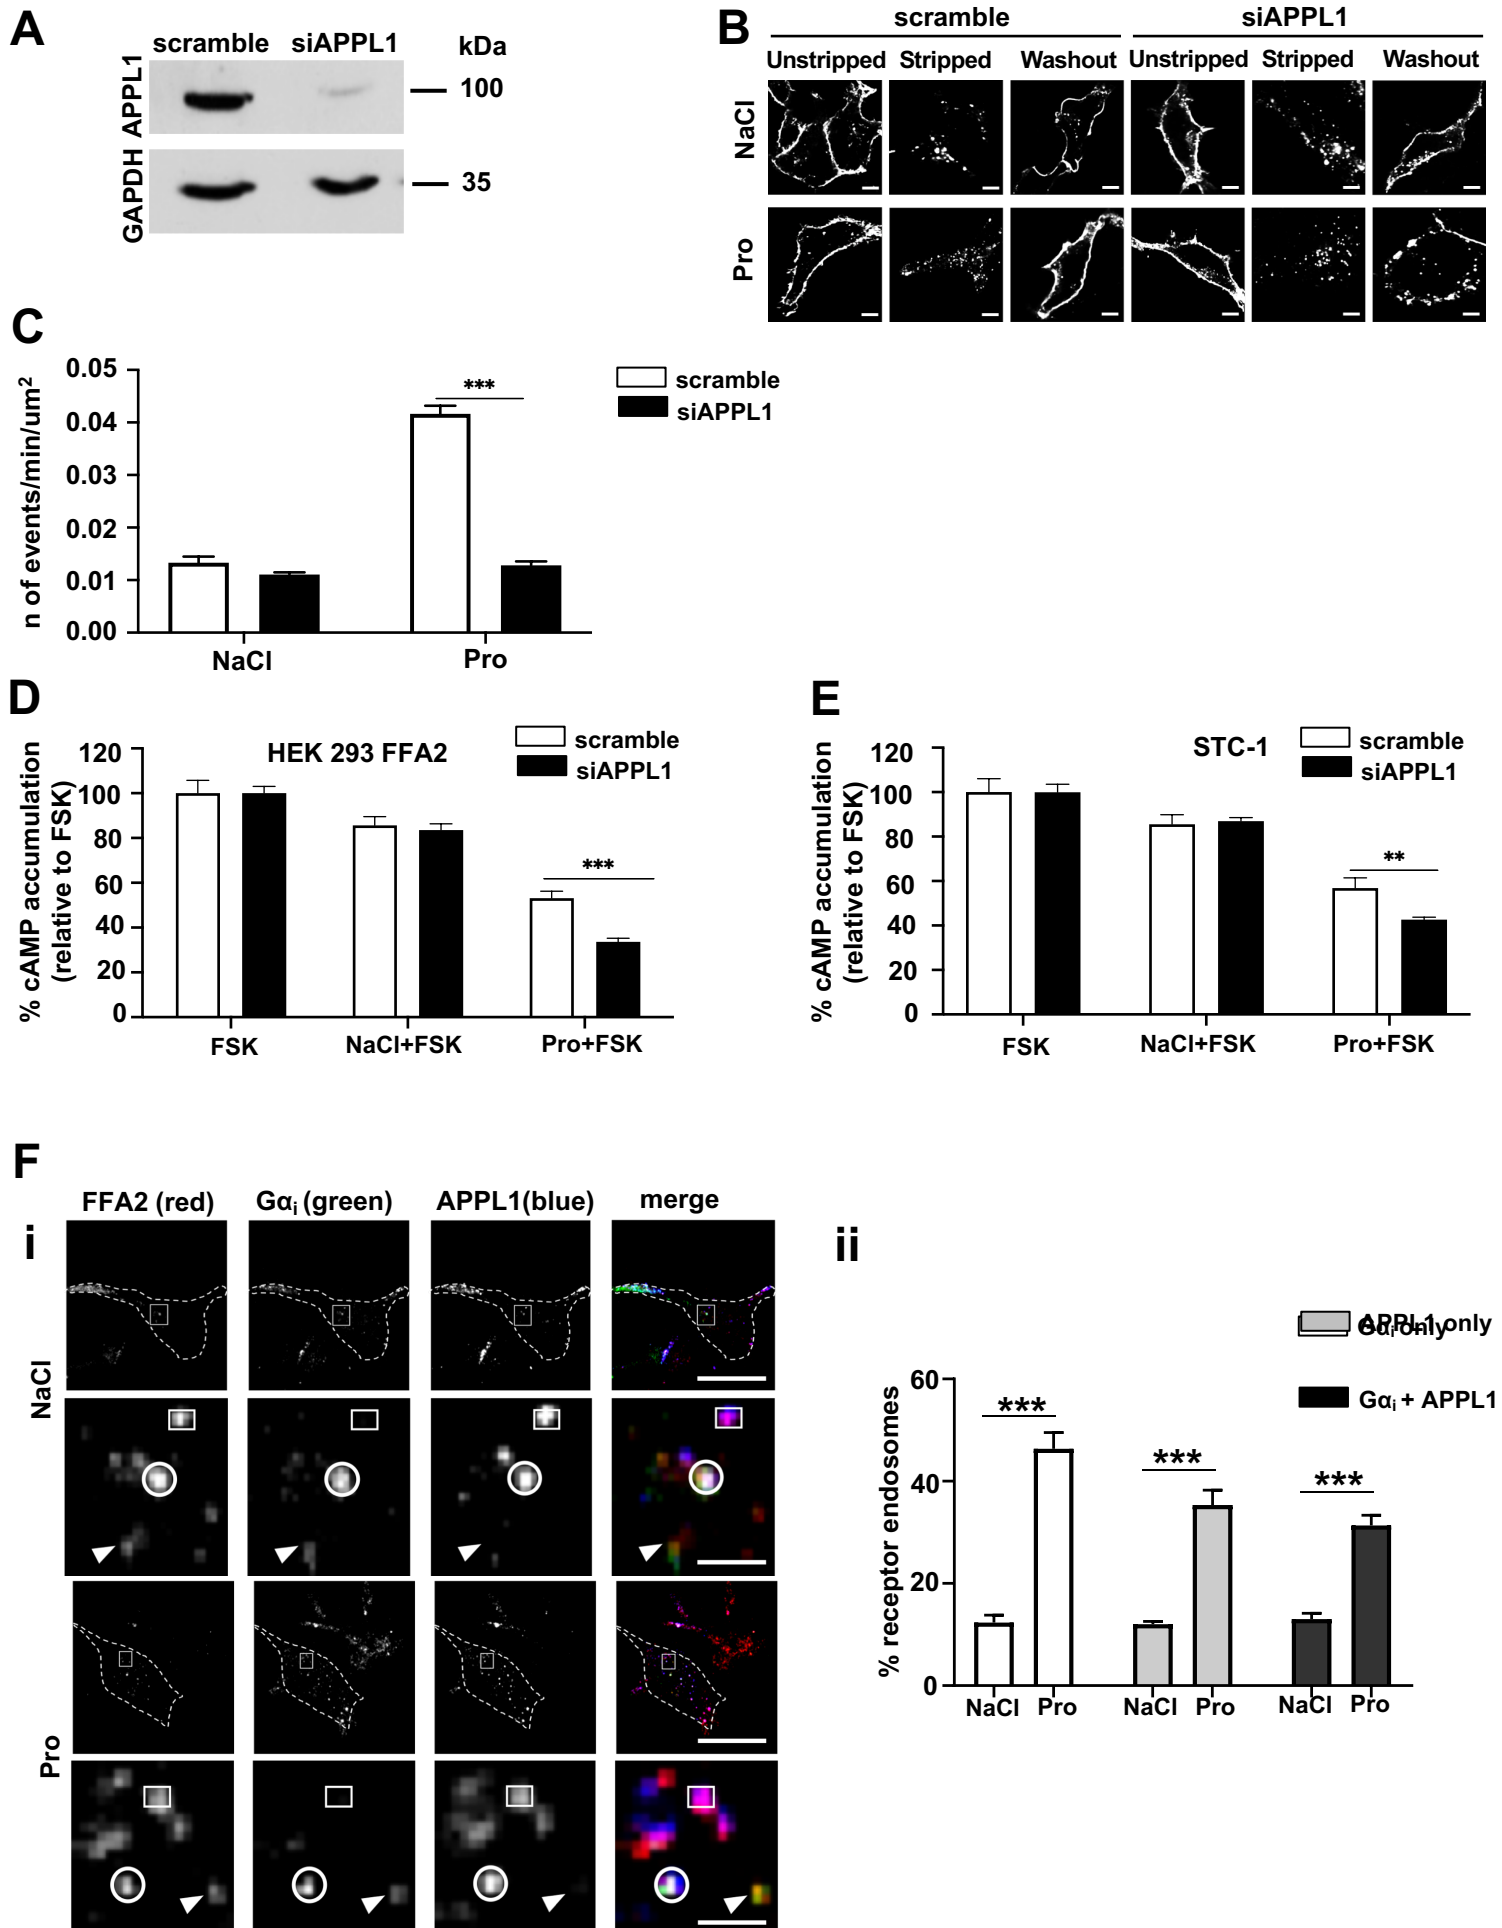



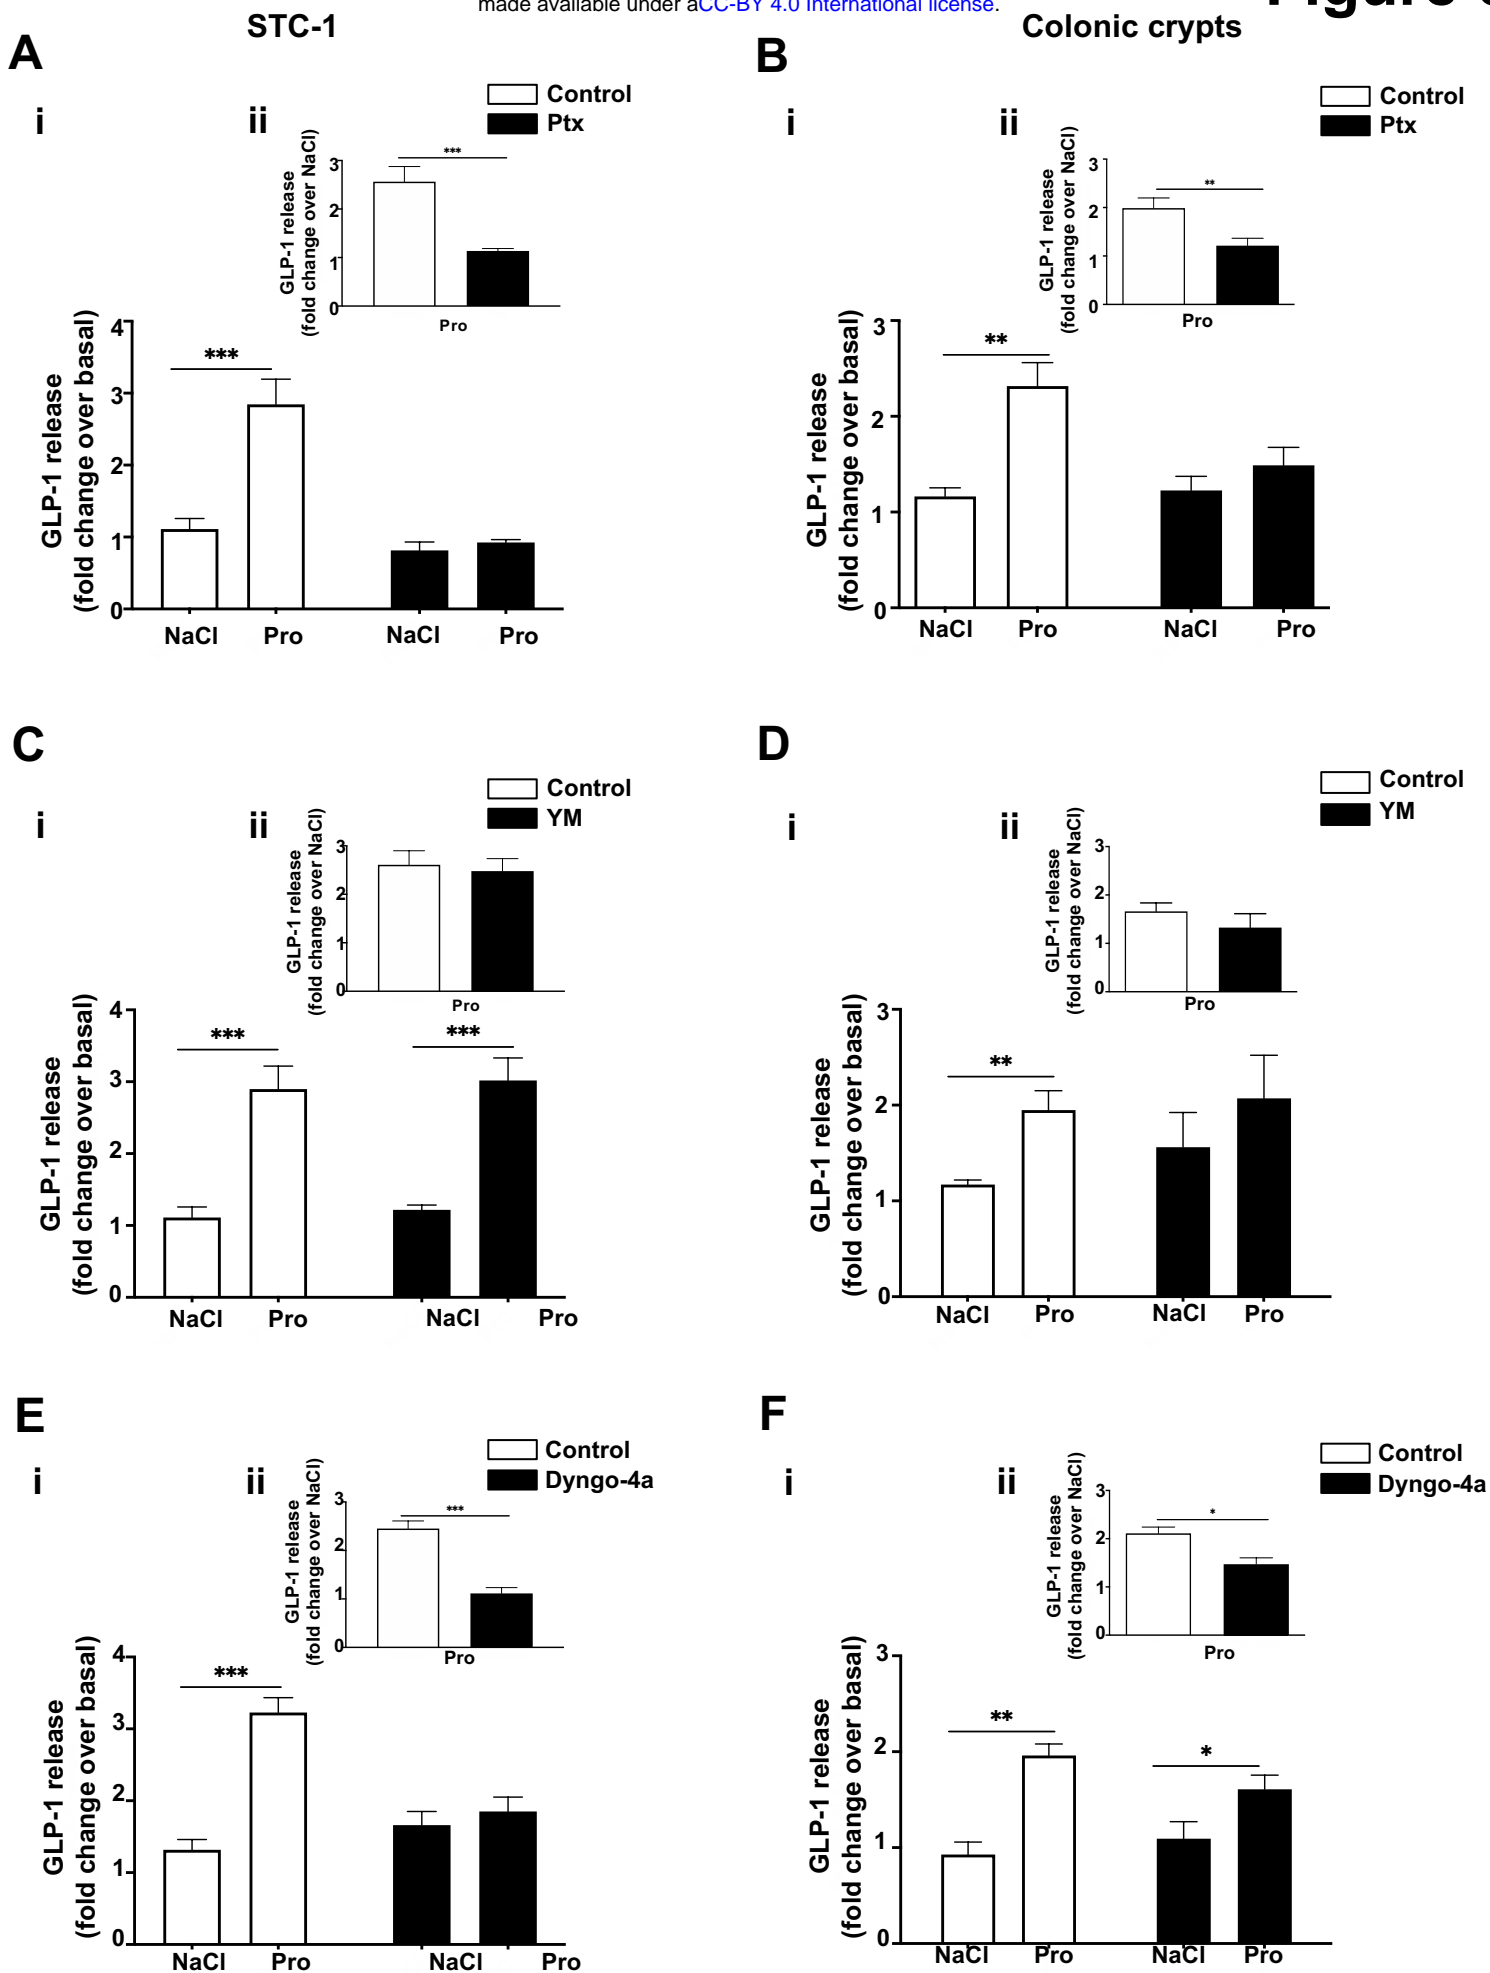

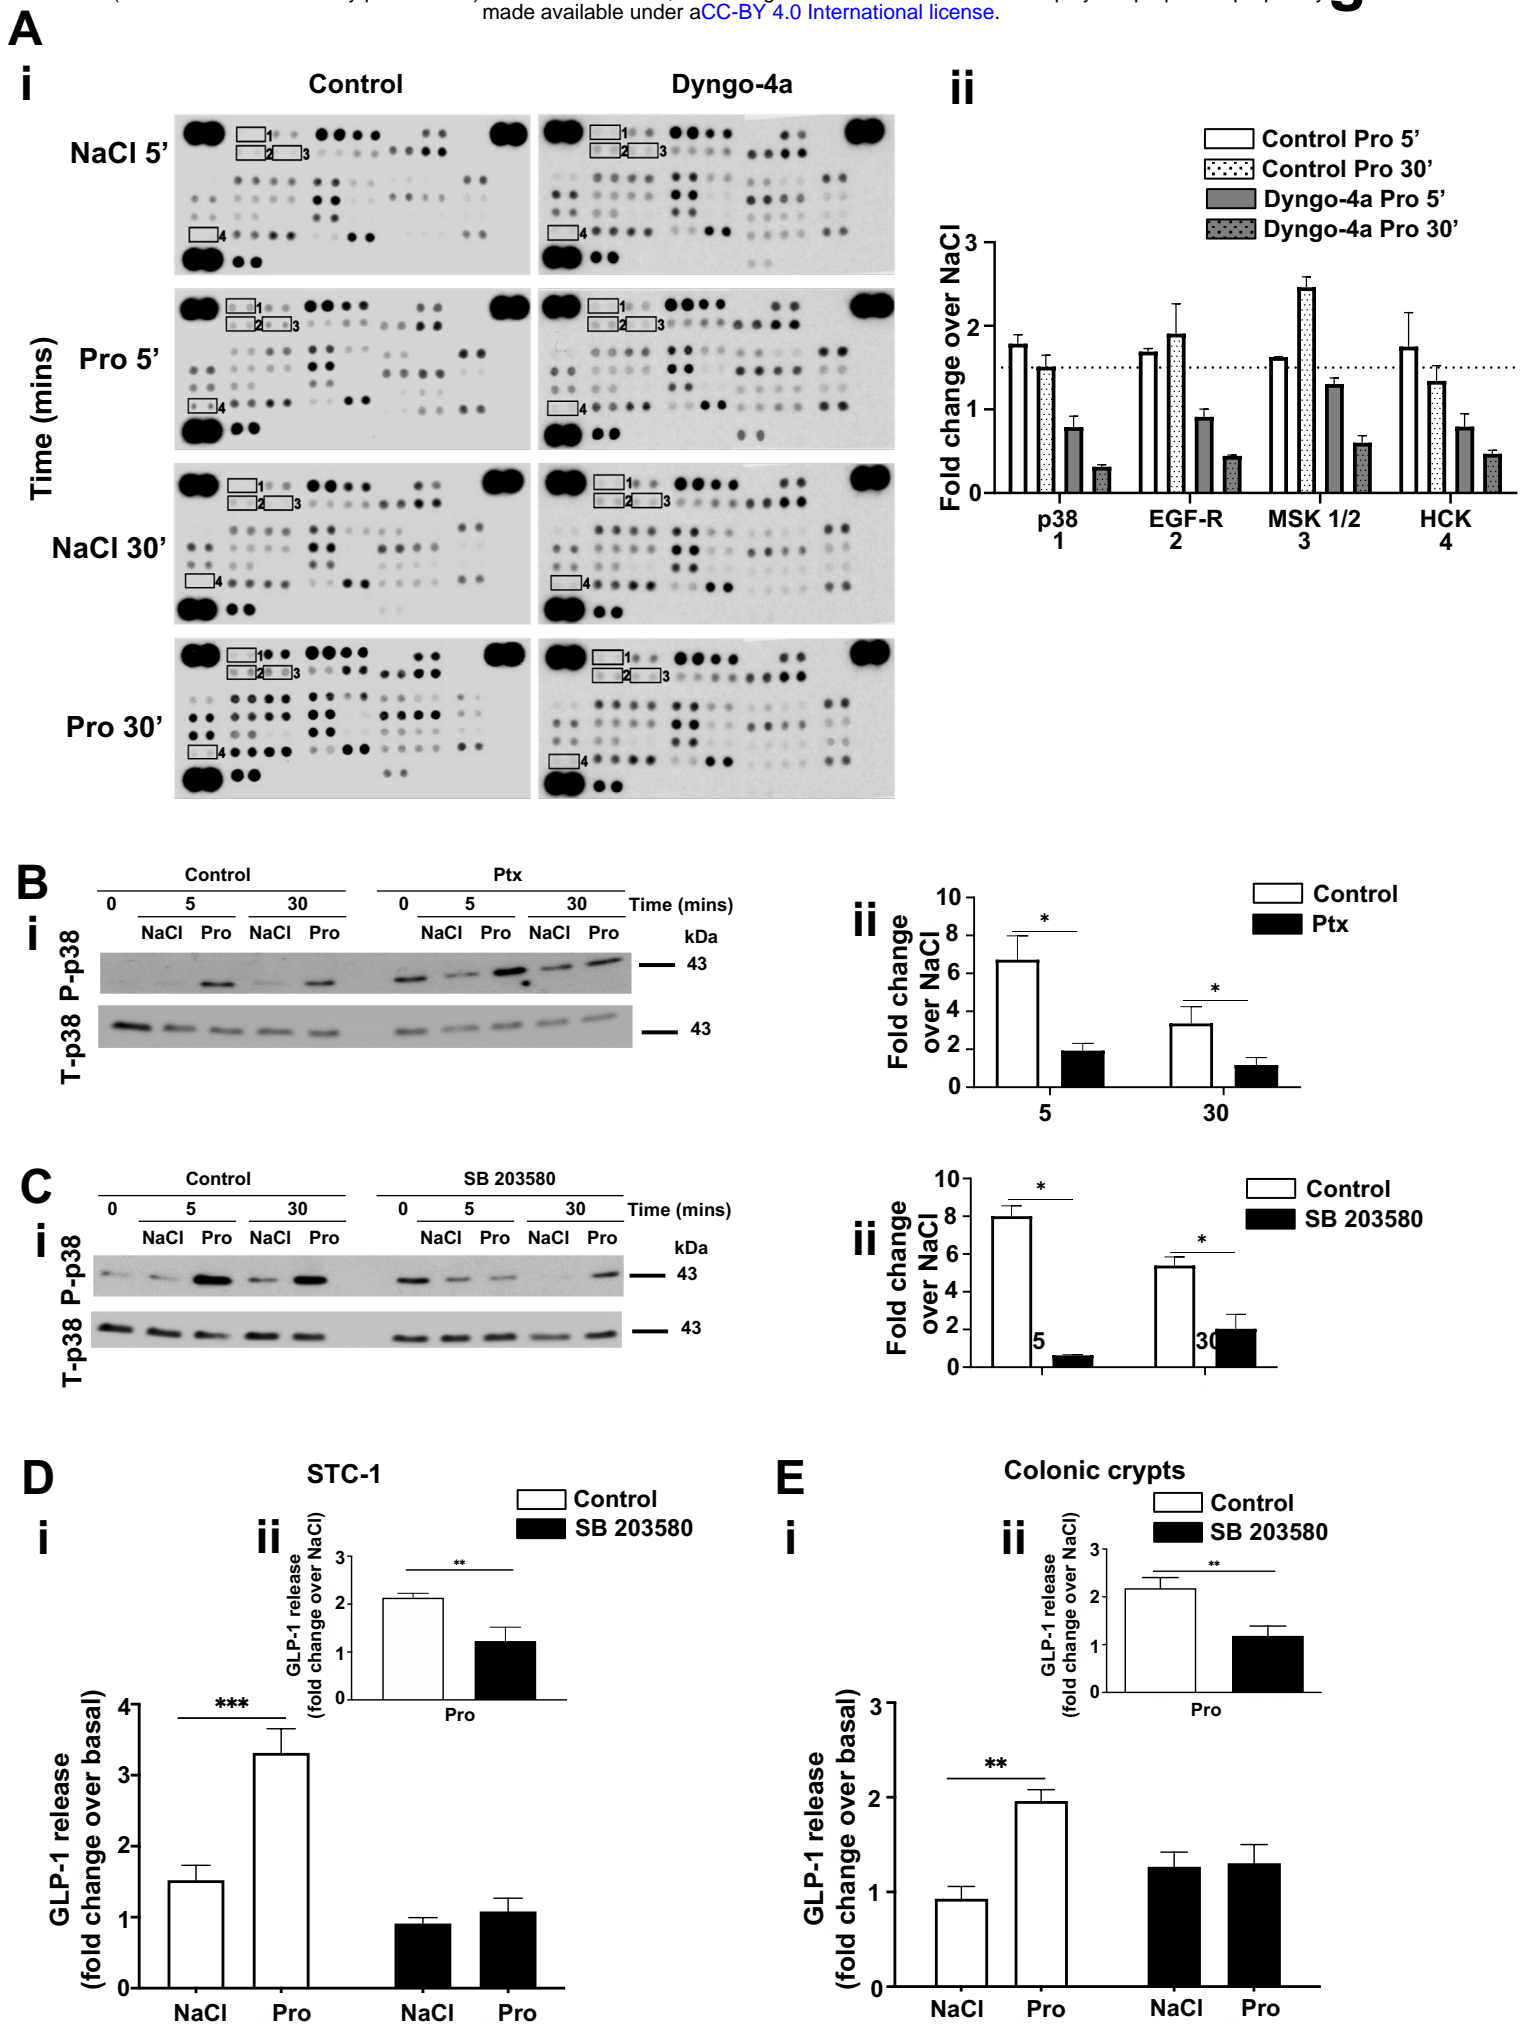

Source: https://www.biorxiv.org/content/10.1101/2020.03.24.004762v1.full.pdf
